# Supplementary material for: Synthesis and catalytic activity of iron complexes with bidentate NHC ligands
Source: Royal Society of Chemistry journal article supplement (doi:10.1039/c3dt32551b), 2013-01-01
Supplement: c3dt32551b.pdf [file c3dt32551b.pdf]

## Supporting Information: Synthesis and Catalytic Activity of Iron Complexes with Bidentate NHC Ligands

Jianguo Wu,<sup>a</sup> Wei Dai,<sup>a</sup> Joy H. Farnaby,<sup>a</sup> Nilay Hazari,<sup>a,\*</sup> Jennifer J. Le Roy,<sup>b</sup> Valeriu  
Mereacre,<sup>c</sup> Muralee Murugesu,<sup>b</sup> Annie K. Powell<sup>c</sup> and Michael K. Takase<sup>a</sup>

<sup>a</sup>The Department of Chemistry, Yale University, P. O. Box 208107, New Haven,  
Connecticut, 06520, USA; <sup>b</sup>The Department of Chemistry, University of Ottawa, 10 Marie  
Curie, Ottawa, ON, K1N6N5, Canada; <sup>c</sup>Institut für Anorganische Chemie, Karlsruhe Institute  
of Technology, Engesserstr. 15, D-76131 Karlsruhe, Germany. E-mail:

[nilay.hazari@yale.edu](mailto:nilay.hazari@yale.edu)

### *Table of Contents*

*Magnetic Measurements*      S2

*X-Ray Crystallography*      S7

## Magnetic Measurements

**Figure S1:** Temperature dependence of the  $\chi T$  product at 0.1 T for complex **2** (with  $\chi$  being the molar susceptibility per molecule defined as  $M/H$ ).

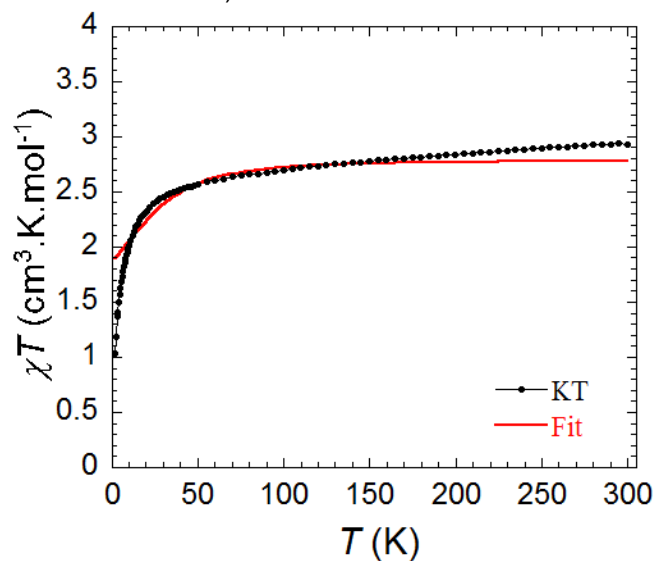

**Figure S2:** Temperature dependence of the  $\chi T$  product at 0.1 T for complex **3** (with  $\chi$  being the molar susceptibility per molecule defined as  $M/H$ ).

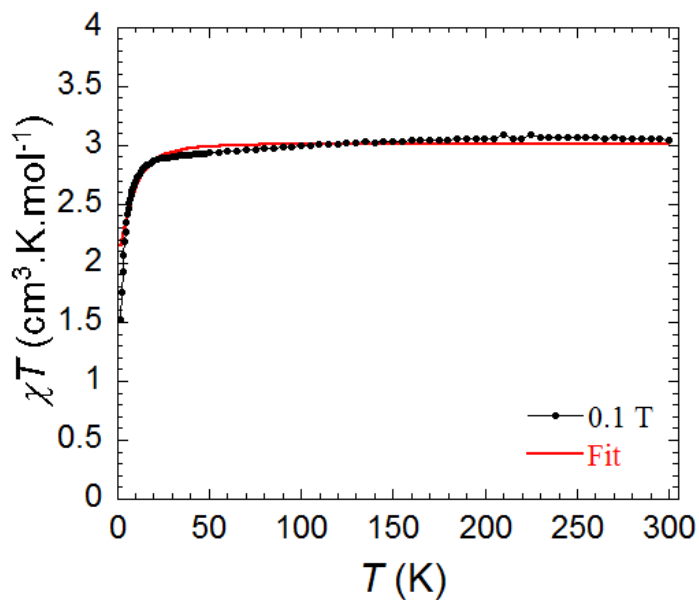

**Figure S3:** Temperature dependence of the  $\chi T$  product at 0.1 T for complex **4** (with  $\chi$  being the molar susceptibility per molecule defined as  $M/H$ ).

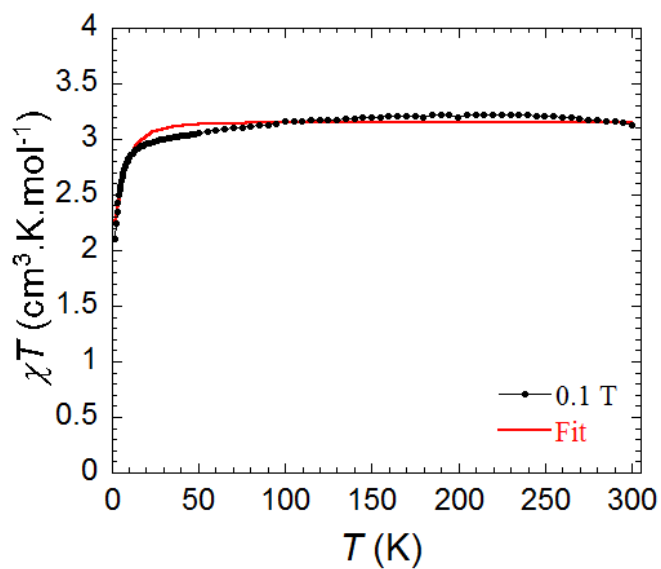

**Figure S4:** Field dependence of the magnetization (top) and reduced magnetization (bottom) for **2** at 1.9, 3, 5, and 8 K.

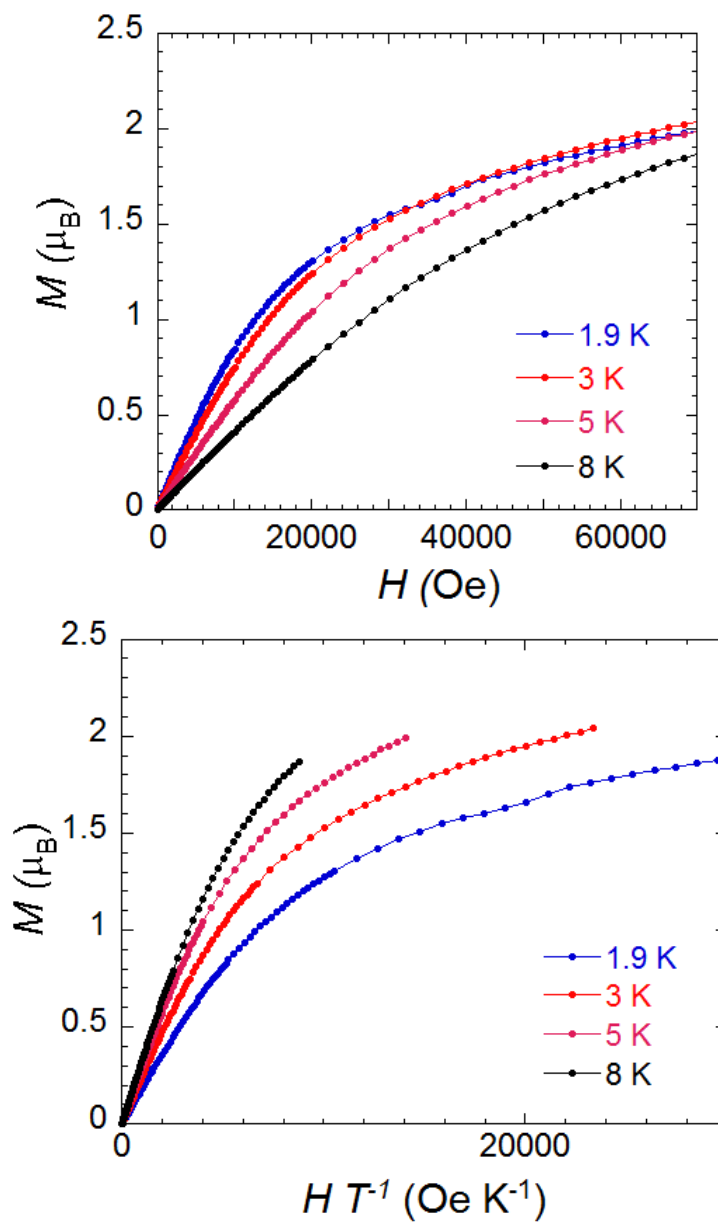

**Figure S5:** Field dependence of the magnetization (top) and reduced magnetization (bottom) for **3** at 1.9, 3, 5, and 8 K.

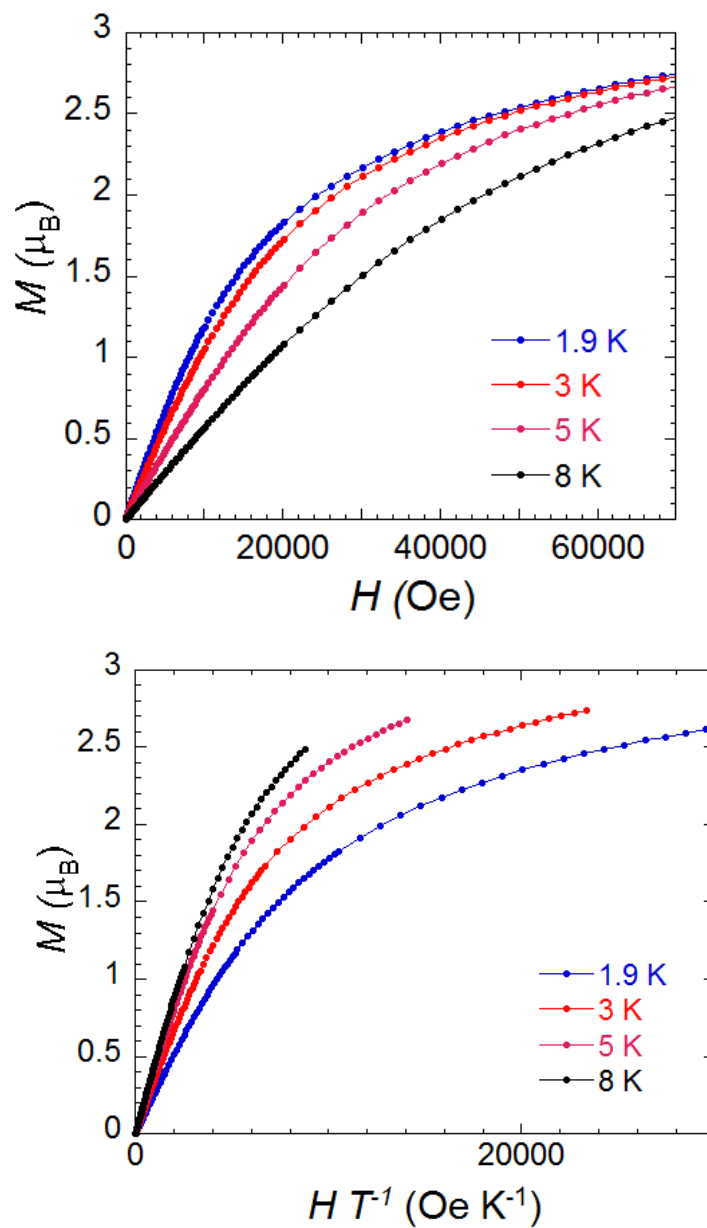

**Figure S6:** Field dependence of the magnetization (top) and reduced magnetization (bottom) for **4** at 1.9, 3, 5, and 8 K.

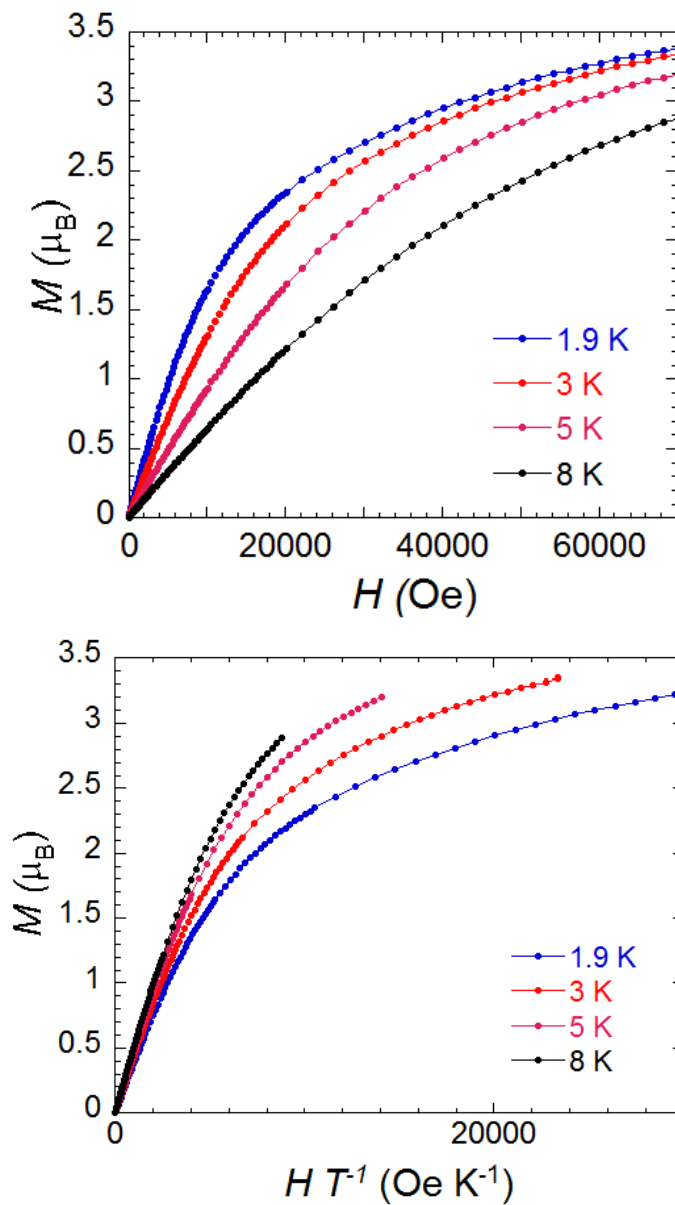

## X-Ray Crystallography

Low-temperature diffraction data ( $\omega$ -scans) were collected on a Rigaku MicroMax-007HF diffractometer coupled to a Saturn994+ CCD detector with Cu  $K_{\alpha}$  ( $\lambda = 1.54178 \text{ \AA}$ ) or on a Rigaku R-AXIS RAPID diffractometer coupled to a R-AXIS RAPID imaging plate detector with Mo  $K_{\alpha}$  radiation ( $\lambda = 0.71073 \text{ \AA}$ ). All structures were solved by direct methods using SHELXS<sup>i</sup> and refined against  $F^2$  on all data by full-matrix least squares with SHELXL-97<sup>ii</sup> using established refinement techniques.<sup>iii</sup> All non-hydrogen atoms were refined anisotropically. All hydrogen atoms were included into the model at geometrically calculated positions and refined using a riding model. The isotropic displacement parameters of all hydrogen atoms were fixed to 1.2 times the  $U$  value of the atoms they are linked to (1.5 times for methyl groups). All disorders were refined with the help of similarity restraints on the 1,2- and 1,3- distances and displacement parameters as well as rigid bond restraints for anisotropic displacement parameters.

Compound **2** crystallizes in the triclinic space group  $P-1$  with one molecule in the asymmetric unit along with 1.5 molecules of benzene. The phenyl group was disordered over two positions. One of the benzene molecules is disordered over two positions and the other benzene is located near an inversion center and is disordered over four positions, two of which are pairwise related to the other by the crystallographic inversion center. All benzene molecules were restrained to be flat.

Compound **3** crystallizes in the monoclinic space group  $P2_1/n$  with one molecule in the asymmetric unit along with half a molecule of THF. The entire molecule was disordered over two positions. The THF molecule is located near an inversion center and is disordered over four positions, two of which are pairwise related to the other two by the crystallographic inversion center.

Compound **4** crystallizes in the monoclinic space group  $P2_1/c$  with two molecules in the asymmetric unit along with one molecule of benzene. One of the phenyl groups was disordered over two positions.

Compound **5** crystallizes in the monoclinic space group  $P2_1/c$  with two molecules in the asymmetric unit along with one molecule of toluene. The toluene is disordered.

### X-Ray Data for {BnN(CH<sub>2</sub>CH<sub>2</sub>CH<sub>2</sub>-*N*-*tert*-butyl-imidazole-2-ylidene)<sub>2</sub>}FeCl<sub>2</sub> (2)

**Table S1.** Crystal data and structure refinement for {BnN(CH<sub>2</sub>CH<sub>2</sub>CH<sub>2</sub>-*N*-*tert*-butyl-imidazole-2-ylidene)<sub>2</sub>}FeCl<sub>2</sub> (2)

|                                   |                                                                   |                                                    |
|-----------------------------------|-------------------------------------------------------------------|----------------------------------------------------|
| Empirical formula                 | C <sub>36</sub> H <sub>50</sub> Cl <sub>2</sub> Fe N <sub>5</sub> |                                                    |
| Formula weight                    | 679.56                                                            |                                                    |
| Temperature                       | 93(2) K                                                           |                                                    |
| Wavelength                        | 1.54187 Å                                                         |                                                    |
| Crystal system                    | Triclinic                                                         |                                                    |
| Space group                       | P-1                                                               |                                                    |
| Unit cell dimensions              | a = 9.5506(2) Å<br>b = 14.1282(3) Å<br>c = 14.2614(10) Å          | α = 85.624(6)°<br>β = 87.635(6)°<br>γ = 86.017(6)° |
| Volume                            | 1912.84(15) Å <sup>3</sup>                                        |                                                    |
| Z                                 | 2                                                                 |                                                    |
| Density (calculated)              | 1.224 Mg/m <sup>3</sup>                                           |                                                    |
| Absorption coefficient            | 4.665 mm <sup>-1</sup>                                            |                                                    |
| F(000)                            | 722                                                               |                                                    |
| Crystal size                      | 0.20 x 0.10 x 0.05 mm <sup>3</sup>                                |                                                    |
| Theta range for data collection   | 3.11 to 65.82°                                                    |                                                    |
| Index ranges                      | -11 ≤ h ≤ 11, -16 ≤ k ≤ 16, -15 ≤ l ≤ 16                          |                                                    |
| Reflections collected             | 55654                                                             |                                                    |
| Independent reflections           | 6506 [R(int) = 0.0991]                                            |                                                    |
| Completeness to theta = 65.82°    | 97.9 %                                                            |                                                    |
| Absorption correction             | Semi-empirical from equivalents                                   |                                                    |
| Max. and min. transmission        | 0.8002 and 0.4556                                                 |                                                    |
| Refinement method                 | Full-matrix least-squares on F <sup>2</sup>                       |                                                    |
| Data / restraints / parameters    | 6506 / 1051 / 595                                                 |                                                    |
| Goodness-of-fit on F <sup>2</sup> | 1.075                                                             |                                                    |
| Final R indices [I > 2σ(I)]       | R1 = 0.0832, wR2 = 0.2388                                         |                                                    |
| R indices (all data)              | R1 = 0.0898, wR2 = 0.2486                                         |                                                    |
| Largest diff. peak and hole       | 1.077 and -1.022 e.Å <sup>-3</sup>                                |                                                    |

**Table S2.** Atomic coordinates (x 10<sup>4</sup>) and equivalent isotropic displacement parameters (Å<sup>2</sup> x 10<sup>3</sup>) for {BnN(CH<sub>2</sub>CH<sub>2</sub>CH<sub>2</sub>-*N*-*tert*-butyl-imidazole-2-ylidene)<sub>2</sub>}FeCl<sub>2</sub> (2)

| Atom  | x       | y        | z       | U(eq) |
|-------|---------|----------|---------|-------|
| Cl(1) | 7364(1) | -1396(1) | 1730(1) | 49(1) |
| Cl(2) | 4519(1) | 313(1)   | 2511(1) | 47(1) |
| Fe(1) | 6968(1) | 112(1)   | 2260(1) | 40(1) |
| C(1)  | 7398(4) | 522(3)   | 3641(3) | 42(1) |
| N(1)  | 7564(4) | 35(3)    | 4501(2) | 44(1) |
| C(13) | 7648(5) | -1028(3) | 4680(3) | 49(1) |
| C(14) | 6231(5) | -1378(4) | 4493(4) | 62(1) |
| C(15) | 8815(5) | -1450(3) | 4039(3) | 52(1) |
| C(16) | 8038(6) | -1298(4) | 5688(3) | 66(1) |
| C(2)  | 7587(5) | 659(3)   | 5203(3) | 51(1) |
| C(3)  | 7463(5) | 1540(4)  | 4780(3) | 53(1) |
| N(2)  | 7351(4) | 1444(3)  | 3831(2) | 45(1) |
| C(4)  | 7129(5) | 2255(3)  | 3131(3) | 48(1) |
| C(5)  | 5642(5) | 2705(3)  | 3177(3) | 52(1) |
| C(6)  | 5454(5) | 3530(3)  | 2443(3) | 53(1) |
| N(3)  | 5720(4) | 3268(3)  | 1467(3) | 51(1) |



|        |            |          |          |         |
|--------|------------|----------|----------|---------|
| C(21)  | 5931(5)    | 4132(3)  | 851(4)   | 58(1)   |
| C(22)  | 7257(12)   | 4603(9)  | 968(19)  | 56(3)   |
| C(23)  | 8552(11)   | 4095(9)  | 1011(13) | 62(3)   |
| C(24)  | 9763(11)   | 4551(8)  | 1064(14) | 70(3)   |
| C(25)  | 9711(11)   | 5529(7)  | 1046(13) | 69(3)   |
| C(26)  | 8436(12)   | 6052(7)  | 999(11)  | 63(3)   |
| C(27)  | 7218(13)   | 5592(8)  | 965(13)  | 58(3)   |
| C(22A) | 7240(20)   | 4604(16) | 1110(40) | 60(4)   |
| C(23A) | 8500(20)   | 4087(16) | 1320(20) | 62(4)   |
| C(24A) | 9720(20)   | 4504(14) | 1500(20) | 69(4)   |
| C(25A) | 9720(20)   | 5486(14) | 1490(20) | 74(4)   |
| C(26A) | 8460(20)   | 6025(15) | 1350(20) | 72(4)   |
| C(27A) | 7260(30)   | 5583(16) | 1180(30) | 65(4)   |
| C(7)   | 4522(5)    | 2795(3)  | 1159(3)  | 54(1)   |
| C(8)   | 4751(5)    | 2306(3)  | 241(3)   | 51(1)   |
| C(9)   | 5601(4)    | 1360(3)  | 285(3)   | 48(1)   |
| N(4)   | 7102(4)    | 1431(2)  | 412(2)   | 43(1)   |
| C(10)  | 7935(5)    | 1914(3)  | -250(3)  | 52(1)   |
| C(11)  | 9245(5)    | 1789(3)  | 44(3)    | 51(1)   |
| N(5)   | 9214(4)    | 1225(2)  | 877(2)   | 41(1)   |
| C(17)  | 10534(4)   | 968(3)   | 1397(3)  | 42(1)   |
| C(18)  | 11641(5)   | 575(4)   | 715(3)   | 54(1)   |
| C(19)  | 10291(5)   | 198(3)   | 2177(3)  | 48(1)   |
| C(20)  | 10995(5)   | 1856(3)  | 1806(3)  | 54(1)   |
| C(12)  | 7880(4)    | 999(3)   | 1122(3)  | 41(1)   |
| C(1S)  | 3407(8)    | 7850(5)  | 2664(6)  | 58(2)   |
| C(2S)  | 4378(6)    | 7110(4)  | 2508(4)  | 58(1)   |
| C(3S)  | 3945(6)    | 6206(4)  | 2460(5)  | 71(2)   |
| C(4S)  | 2548(6)    | 6058(4)  | 2559(7)  | 85(2)   |
| C(5S)  | 1571(7)    | 6801(5)  | 2704(7)  | 80(2)   |
| C(6S)  | 2009(8)    | 7690(5)  | 2781(8)  | 65(2)   |
| C(1T)  | 3660(40)   | 7790(20) | 2630(40) | 64(4)   |
| C(2T)  | 4680(30)   | 7110(20) | 2910(30) | 70(4)   |
| C(3T)  | 4320(30)   | 6270(20) | 3370(30) | 81(5)   |
| C(4T)  | 2930(30)   | 6090(20) | 3500(30) | 89(5)   |
| C(5T)  | 1910(30)   | 6780(30) | 3260(30) | 77(4)   |
| C(6T)  | 2270(40)   | 7630(30) | 2810(50) | 69(4)   |
| C(1U)  | 7890(20)   | 4286(9)  | 5041(9)  | 128(5)  |
| C(2U)  | 8800(16)   | 4270(9)  | 4287(9)  | 118(4)  |
| C(3U)  | 8677(16)   | 4943(9)  | 3555(8)  | 110(4)  |
| C(4U)  | 7651(17)   | 5667(9)  | 3624(9)  | 111(4)  |
| C(5U)  | 6741(18)   | 5694(8)  | 4368(10) | 115(4)  |
| C(6U)  | 6790(20)   | 4987(11) | 5075(10) | 137(5)  |
| C(1V)  | 10970(80)  | 4390(50) | 5040(60) | 110(9)  |
| C(3V)  | 9130(100)  | 4750(60) | 3970(40) | 113(7)  |
| C(2V)  | 10290(100) | 4200(40) | 4250(50) | 115(8)  |
| C(4V)  | 8620(80)   | 5480(50) | 4480(60) | 113(7)  |
| C(5V)  | 9300(100)  | 5690(50) | 5270(50) | 110(9)  |
| C(6V)  | 10460(100) | 5140(60) | 5550(40) | 109(10) |

$$B_{\text{eq}} = 8/3 \pi^2 (U_{11}(\text{aa}^*)^2 + U_{22}(\text{bb}^*)^2 + U_{33}(\text{cc}^*)^2 + 2U_{12}(\text{aa}^*\text{bb}^*)\cos \gamma + 2U_{13}(\text{aa}^*\text{cc}^*)\cos \beta + 2U_{23}(\text{bb}^*\text{cc}^*)\cos \alpha)$$

**Table S3.** Anisotropic displacement parameters ( $\text{\AA}^2 \times 10^3$ ) for **{BnN(CH<sub>2</sub>CH<sub>2</sub>CH<sub>2</sub>-N-tert-butyl-imidazole-2-ylidene)<sub>2</sub>}FeCl<sub>2</sub> (2)**

| Atom   | U <sup>11</sup> | U <sup>22</sup> | U <sup>33</sup> | U <sup>23</sup> | U <sup>13</sup> | U <sup>12</sup> |
|--------|-----------------|-----------------|-----------------|-----------------|-----------------|-----------------|
| Cl(1)  | 63(1)           | 48(1)           | 40(1)           | -3(1)           | 0(1)            | -17(1)          |
| Cl(2)  | 46(1)           | 54(1)           | 41(1)           | 5(1)            | -2(1)           | -13(1)          |
| Fe(1)  | 46(1)           | 46(1)           | 30(1)           | 2(1)            | 0(1)            | -13(1)          |
| C(1)   | 43(2)           | 51(2)           | 32(2)           | 2(2)            | -2(2)           | -11(2)          |
| N(1)   | 49(2)           | 53(2)           | 31(2)           | 3(1)            | -2(1)           | -12(2)          |
| C(13)  | 58(2)           | 58(3)           | 32(2)           | 4(2)            | 2(2)            | -9(2)           |
| C(14)  | 53(3)           | 61(3)           | 72(3)           | 17(2)           | -5(2)           | -17(2)          |
| C(15)  | 58(3)           | 57(3)           | 40(2)           | -4(2)           | 2(2)            | -5(2)           |
| C(16)  | 85(4)           | 78(3)           | 33(2)           | 7(2)            | -2(2)           | 7(3)            |
| C(2)   | 59(3)           | 66(3)           | 31(2)           | -4(2)           | -6(2)           | -14(2)          |
| C(3)   | 62(3)           | 59(3)           | 40(2)           | -7(2)           | -4(2)           | -16(2)          |
| N(2)   | 54(2)           | 51(2)           | 30(2)           | -2(1)           | -1(1)           | -15(2)          |
| C(4)   | 56(2)           | 47(2)           | 40(2)           | 1(2)            | -2(2)           | -14(2)          |
| C(5)   | 62(3)           | 50(2)           | 44(2)           | 0(2)            | 5(2)            | -11(2)          |
| C(6)   | 64(3)           | 46(2)           | 51(3)           | -1(2)           | -3(2)           | -9(2)           |
| N(3)   | 58(2)           | 49(2)           | 45(2)           | 5(2)            | -3(2)           | -13(2)          |
| C(21)  | 66(2)           | 49(2)           | 57(3)           | 10(2)           | -5(2)           | -12(2)          |
| C(22)  | 68(3)           | 46(3)           | 54(8)           | 8(4)            | -2(4)           | -13(3)          |
| C(23)  | 66(3)           | 47(3)           | 75(8)           | -1(4)           | 0(5)            | -14(2)          |
| C(24)  | 64(3)           | 55(3)           | 93(9)           | 0(5)            | 8(5)            | -16(3)          |
| C(25)  | 72(3)           | 54(3)           | 82(8)           | 8(5)            | 2(5)            | -28(3)          |
| C(26)  | 83(4)           | 45(3)           | 63(7)           | 9(4)            | -1(5)           | -19(2)          |
| C(27)  | 72(3)           | 47(3)           | 56(8)           | 5(4)            | -6(4)           | -10(3)          |
| C(22A) | 66(4)           | 49(5)           | 63(10)          | 14(6)           | 9(6)            | -15(4)          |
| C(23A) | 62(4)           | 51(5)           | 70(10)          | 13(7)           | 9(6)            | -17(4)          |
| C(24A) | 68(5)           | 56(5)           | 83(10)          | 6(8)            | 3(7)            | -17(4)          |
| C(25A) | 79(5)           | 58(5)           | 86(10)          | 7(8)            | 7(8)            | -25(5)          |
| C(26A) | 87(6)           | 49(5)           | 78(11)          | 14(7)           | 7(8)            | -20(4)          |
| C(27A) | 81(5)           | 50(4)           | 64(11)          | 8(6)            | 3(7)            | -13(4)          |
| C(7)   | 51(2)           | 55(3)           | 56(3)           | 0(2)            | -2(2)           | -14(2)          |
| C(8)   | 49(2)           | 56(3)           | 48(3)           | 7(2)            | -3(2)           | -13(2)          |
| C(9)   | 46(2)           | 53(2)           | 44(2)           | 7(2)            | -4(2)           | -15(2)          |
| N(4)   | 48(2)           | 48(2)           | 32(2)           | 6(1)            | 0(1)            | -12(2)          |
| C(10)  | 54(2)           | 62(3)           | 39(2)           | 13(2)           | 0(2)            | -16(2)          |
| C(11)  | 52(2)           | 62(3)           | 38(2)           | 12(2)           | -1(2)           | -15(2)          |
| N(5)   | 46(2)           | 48(2)           | 30(2)           | 4(1)            | -1(1)           | -13(1)          |
| C(17)  | 44(2)           | 47(2)           | 34(2)           | 1(2)            | -5(2)           | -11(2)          |
| C(18)  | 46(2)           | 75(3)           | 40(2)           | -3(2)           | 2(2)            | -5(2)           |
| C(19)  | 49(2)           | 55(2)           | 39(2)           | 7(2)            | -5(2)           | -10(2)          |
| C(20)  | 59(3)           | 50(2)           | 53(3)           | -3(2)           | -8(2)           | -12(2)          |
| C(12)  | 45(2)           | 46(2)           | 32(2)           | 3(2)            | -2(2)           | -12(2)          |
| C(1S)  | 81(4)           | 53(3)           | 41(3)           | -3(2)           | 4(3)            | -19(2)          |
| C(2S)  | 59(3)           | 61(3)           | 57(4)           | -1(3)           | -2(3)           | -21(2)          |
| C(3S)  | 62(3)           | 53(3)           | 101(5)          | -12(3)          | 6(3)            | -8(2)           |
| C(4S)  | 67(3)           | 51(3)           | 139(6)          | -9(4)           | 9(4)            | -21(2)          |
| C(5S)  | 57(3)           | 71(3)           | 113(6)          | -3(4)           | 8(4)            | -13(2)          |
| C(6S)  | 74(3)           | 58(3)           | 61(4)           | -4(3)           | 10(3)           | 3(3)            |
| C(1T)  | 75(7)           | 62(8)           | 57(9)           | -3(8)           | 4(8)            | -16(6)          |
| C(2T)  | 75(7)           | 62(8)           | 71(9)           | -2(8)           | 4(8)            | -14(6)          |
| C(3T)  | 82(7)           | 65(8)           | 93(10)          | 8(8)            | 15(9)           | -7(8)           |
| C(4T)  | 87(9)           | 66(9)           | 112(12)         | 6(10)           | 21(11)          | -16(7)          |
| C(5T)  | 75(7)           | 66(8)           | 93(9)           | -10(8)          | 16(8)           | -19(6)          |
| C(6T)  | 74(6)           | 65(7)           | 70(9)           | -9(8)           | 6(9)            | -13(7)          |
| C(1U)  | 262(15)         | 66(7)           | 63(7)           | 17(6)           | -42(8)          | -61(8)          |
| C(2U)  | 210(12)         | 86(7)           | 69(7)           | 8(6)            | -60(7)          | -68(7)          |

|       |         |        |        |        |         |         |
|-------|---------|--------|--------|--------|---------|---------|
| C(3U) | 183(12) | 86(7)  | 72(7)  | 13(6)  | -41(7)  | -93(7)  |
| C(4U) | 181(12) | 84(7)  | 78(7)  | 32(6)  | -56(7)  | -90(7)  |
| C(5U) | 210(13) | 60(6)  | 83(8)  | 13(5)  | -47(7)  | -70(7)  |
| C(6U) | 266(15) | 69(7)  | 80(8)  | 16(6)  | -12(9)  | -63(8)  |
| C(1V) | 180(20) | 89(18) | 64(18) | 32(16) | -35(14) | -87(16) |
| C(3V) | 190(15) | 86(12) | 72(12) | 27(11) | -43(11) | -87(11) |
| C(2V) | 194(16) | 92(14) | 67(14) | 31(13) | -41(13) | -83(12) |
| C(4V) | 186(15) | 84(12) | 77(12) | 26(11) | -39(12) | -92(11) |
| C(5V) | 180(20) | 84(17) | 70(17) | 28(13) | -34(15) | -91(16) |
| C(6V) | 180(20) | 85(19) | 66(18) | 34(15) | -31(15) | -91(18) |

The general temperature factor expression:  $\exp(-2\pi^2(a^*U_{11}h^2 + b^*U_{22}k^2 + c^*U_{33}l^2 + 2a*b*U_{12}hk + 2a*c*U_{13}hl + 2b*c*U_{23}kl))$

**Table S4.** Bond lengths (Å) for **{BnN(CH<sub>2</sub>CH<sub>2</sub>CH<sub>2</sub>-*N-tert*-butyl-imidazole-2-ylidene)<sub>2</sub>}FeCl<sub>2</sub> (2)**

|               |            |
|---------------|------------|
| Cl(1)-Fe(1)   | 2.3149(12) |
| Cl(2)-Fe(1)   | 2.3521(11) |
| Fe(1)-C(1)    | 2.158(4)   |
| Fe(1)-C(12)   | 2.166(4)   |
| C(1)-N(2)     | 1.347(6)   |
| C(1)-N(1)     | 1.368(5)   |
| N(1)-C(2)     | 1.387(6)   |
| N(1)-C(13)    | 1.501(6)   |
| C(13)-C(16)   | 1.513(6)   |
| C(13)-C(14)   | 1.513(7)   |
| C(13)-C(15)   | 1.530(6)   |
| C(2)-C(3)     | 1.341(7)   |
| C(3)-N(2)     | 1.380(6)   |
| N(2)-C(4)     | 1.471(5)   |
| C(4)-C(5)     | 1.516(7)   |
| C(5)-C(6)     | 1.513(6)   |
| C(6)-N(3)     | 1.475(6)   |
| N(3)-C(7)     | 1.463(6)   |
| N(3)-C(21)    | 1.469(6)   |
| C(21)-C(22)   | 1.491(10)  |
| C(21)-C(22A)  | 1.528(14)  |
| C(22)-C(23)   | 1.388(10)  |
| C(22)-C(27)   | 1.396(9)   |
| C(23)-C(24)   | 1.370(10)  |
| C(24)-C(25)   | 1.378(10)  |
| C(25)-C(26)   | 1.381(10)  |
| C(26)-C(27)   | 1.375(10)  |
| C(22A)-C(23A) | 1.394(13)  |
| C(22A)-C(27A) | 1.397(13)  |
| C(23A)-C(24A) | 1.379(14)  |
| C(24A)-C(25A) | 1.387(13)  |
| C(25A)-C(26A) | 1.391(14)  |
| C(26A)-C(27A) | 1.381(14)  |
| C(7)-C(8)     | 1.527(7)   |
| C(8)-C(9)     | 1.513(7)   |
| C(9)-N(4)     | 1.464(5)   |
| N(4)-C(12)    | 1.363(5)   |
| N(4)-C(10)    | 1.380(5)   |

|             |           |
|-------------|-----------|
| C(10)-C(11) | 1.332(6)  |
| C(11)-N(5)  | 1.379(5)  |
| N(5)-C(12)  | 1.360(5)  |
| N(5)-C(17)  | 1.499(5)  |
| C(17)-C(18) | 1.513(6)  |
| C(17)-C(19) | 1.518(6)  |
| C(17)-C(20) | 1.523(6)  |
| C(1S)-C(6S) | 1.371(9)  |
| C(1S)-C(2S) | 1.374(8)  |
| C(2S)-C(3S) | 1.377(7)  |
| C(3S)-C(4S) | 1.365(8)  |
| C(4S)-C(5S) | 1.377(8)  |
| C(5S)-C(6S) | 1.364(9)  |
| C(1T)-C(6T) | 1.37(2)   |
| C(1T)-C(2T) | 1.369(13) |
| C(2T)-C(3T) | 1.368(12) |
| C(3T)-C(4T) | 1.369(12) |
| C(4T)-C(5T) | 1.365(12) |
| C(5T)-C(6T) | 1.372(14) |
| C(1U)-C(2U) | 1.352(12) |
| C(1U)-C(6U) | 1.397(19) |
| C(2U)-C(3U) | 1.360(11) |
| C(3U)-C(4U) | 1.373(11) |
| C(4U)-C(5U) | 1.345(11) |
| C(5U)-C(6U) | 1.364(11) |
| C(1V)-C(2V) | 1.368(14) |
| C(1V)-C(6V) | 1.38(2)   |
| C(3V)-C(2V) | 1.366(12) |
| C(3V)-C(4V) | 1.368(12) |
| C(4V)-C(5V) | 1.369(12) |
| C(5V)-C(6V) | 1.366(14) |

**Table S5.** Bond angles (°) for **{BnN(CH<sub>2</sub>CH<sub>2</sub>CH<sub>2</sub>-*N-tert*-butyl-imidazole-2-ylidene)<sub>2</sub>}FeCl<sub>2</sub> (2)**

|                   |            |
|-------------------|------------|
| C(1)-Fe(1)-C(12)  | 113.71(15) |
| C(1)-Fe(1)-Cl(1)  | 126.20(12) |
| C(12)-Fe(1)-Cl(1) | 102.35(12) |
| C(1)-Fe(1)-Cl(2)  | 93.44(11)  |
| C(12)-Fe(1)-Cl(2) | 116.57(11) |
| Cl(1)-Fe(1)-Cl(2) | 104.91(4)  |
| N(2)-C(1)-N(1)    | 104.1(3)   |
| N(2)-C(1)-Fe(1)   | 121.3(3)   |
| N(1)-C(1)-Fe(1)   | 133.9(3)   |
| C(1)-N(1)-C(2)    | 110.7(4)   |
| C(1)-N(1)-C(13)   | 125.5(3)   |
| C(2)-N(1)-C(13)   | 123.8(3)   |
| N(1)-C(13)-C(16)  | 109.7(4)   |
| N(1)-C(13)-C(14)  | 108.2(4)   |
| C(16)-C(13)-C(14) | 110.7(4)   |
| N(1)-C(13)-C(15)  | 108.6(4)   |
| C(16)-C(13)-C(15) | 107.7(4)   |
| C(14)-C(13)-C(15) | 112.0(4)   |
| C(3)-C(2)-N(1)    | 106.7(4)   |
| C(2)-C(3)-N(2)    | 106.9(4)   |

|                      |           |
|----------------------|-----------|
| C(1)-N(2)-C(3)       | 111.5(4)  |
| C(1)-N(2)-C(4)       | 124.9(3)  |
| C(3)-N(2)-C(4)       | 123.4(4)  |
| N(2)-C(4)-C(5)       | 112.6(4)  |
| C(6)-C(5)-C(4)       | 111.0(4)  |
| N(3)-C(6)-C(5)       | 114.0(4)  |
| C(7)-N(3)-C(21)      | 109.7(4)  |
| C(7)-N(3)-C(6)       | 109.8(4)  |
| C(21)-N(3)-C(6)      | 109.2(4)  |
| N(3)-C(21)-C(22)     | 116.1(9)  |
| N(3)-C(21)-C(22A)    | 111.1(17) |
| C(22)-C(21)-C(22A)   | 7(3)      |
| C(23)-C(22)-C(27)    | 118.4(8)  |
| C(23)-C(22)-C(21)    | 122.0(8)  |
| C(27)-C(22)-C(21)    | 119.4(9)  |
| C(24)-C(23)-C(22)    | 120.9(8)  |
| C(23)-C(24)-C(25)    | 120.1(9)  |
| C(24)-C(25)-C(26)    | 120.1(8)  |
| C(27)-C(26)-C(25)    | 119.8(8)  |
| C(26)-C(27)-C(22)    | 120.7(9)  |
| C(23A)-C(22A)-C(27A) | 114.5(14) |
| C(23A)-C(22A)-C(21)  | 122.6(15) |
| C(27A)-C(22A)-C(21)  | 122.8(15) |
| C(24A)-C(23A)-C(22A) | 123.5(15) |
| C(23A)-C(24A)-C(25A) | 120.1(15) |
| C(24A)-C(25A)-C(26A) | 118.3(15) |
| C(27A)-C(26A)-C(25A) | 120.0(15) |
| C(26A)-C(27A)-C(22A) | 123.3(16) |
| N(3)-C(7)-C(8)       | 116.0(4)  |
| C(9)-C(8)-C(7)       | 116.9(4)  |
| N(4)-C(9)-C(8)       | 114.1(4)  |
| C(12)-N(4)-C(10)     | 111.2(4)  |
| C(12)-N(4)-C(9)      | 126.8(3)  |
| C(10)-N(4)-C(9)      | 121.8(3)  |
| C(11)-C(10)-N(4)     | 106.7(4)  |
| C(10)-C(11)-N(5)     | 107.5(4)  |
| C(12)-N(5)-C(11)     | 110.8(3)  |
| C(12)-N(5)-C(17)     | 128.7(3)  |
| C(11)-N(5)-C(17)     | 120.5(3)  |
| N(5)-C(17)-C(18)     | 108.3(3)  |
| N(5)-C(17)-C(19)     | 110.5(3)  |
| C(18)-C(17)-C(19)    | 107.8(4)  |
| N(5)-C(17)-C(20)     | 108.7(3)  |
| C(18)-C(17)-C(20)    | 111.2(4)  |
| C(19)-C(17)-C(20)    | 110.3(4)  |
| N(5)-C(12)-N(4)      | 103.8(3)  |
| N(5)-C(12)-Fe(1)     | 133.8(3)  |
| N(4)-C(12)-Fe(1)     | 122.3(3)  |
| C(6S)-C(1S)-C(2S)    | 120.2(5)  |
| C(1S)-C(2S)-C(3S)    | 119.9(5)  |
| C(4S)-C(3S)-C(2S)    | 119.4(5)  |
| C(3S)-C(4S)-C(5S)    | 120.8(5)  |
| C(6S)-C(5S)-C(4S)    | 119.6(6)  |
| C(5S)-C(6S)-C(1S)    | 120.1(6)  |
| C(6T)-C(1T)-C(2T)    | 120.4(11) |
| C(3T)-C(2T)-C(1T)    | 119.6(12) |

|                   |           |
|-------------------|-----------|
| C(2T)-C(3T)-C(4T) | 119.9(10) |
| C(5T)-C(4T)-C(3T) | 120.3(10) |
| C(4T)-C(5T)-C(6T) | 119.6(12) |
| C(1T)-C(6T)-C(5T) | 119.9(11) |
| C(2U)-C(1U)-C(6U) | 120.5(9)  |
| C(1U)-C(2U)-C(3U) | 121.1(10) |
| C(2U)-C(3U)-C(4U) | 118.1(9)  |
| C(5U)-C(4U)-C(3U) | 121.6(8)  |
| C(4U)-C(5U)-C(6U) | 120.8(10) |
| C(5U)-C(6U)-C(1U) | 117.7(10) |
| C(2V)-C(1V)-C(6V) | 119.9(12) |
| C(2V)-C(3V)-C(4V) | 120.0(11) |
| C(3V)-C(2V)-C(1V) | 120.2(12) |
| C(3V)-C(4V)-C(5V) | 119.9(11) |
| C(6V)-C(5V)-C(4V) | 120.3(12) |
| C(5V)-C(6V)-C(1V) | 119.7(12) |

### X-Ray Data for {BnN(CH<sub>2</sub>CH<sub>2</sub>-*N*-methylbenzimidazole-2-ylidene)<sub>2</sub>}FeCl<sub>2</sub> (3)

**Table S6.** Crystal data and structure refinement for {BnN(CH<sub>2</sub>CH<sub>2</sub>-*N*-methylbenzimidazole-2-ylidene)<sub>2</sub>}FeCl<sub>2</sub> (3)

|                                   |                                                                                     |                 |
|-----------------------------------|-------------------------------------------------------------------------------------|-----------------|
| Empirical formula                 | C <sub>29</sub> H <sub>33</sub> Cl <sub>2</sub> Fe N <sub>5</sub> O <sub>0.50</sub> |                 |
| Formula weight                    | 586.35                                                                              |                 |
| Temperature                       | 93(2) K                                                                             |                 |
| Wavelength                        | 1.54187 Å                                                                           |                 |
| Crystal system                    | Monoclinic                                                                          |                 |
| Space group                       | P2(1)/n                                                                             |                 |
| Unit cell dimensions              | a = 12.9406(3) Å                                                                    | α = 90°         |
|                                   | b = 9.3355(2) Å                                                                     | β = 91.132(6) ° |
|                                   | c = 22.9686(16) Å                                                                   | γ = 90 °        |
| Volume                            | 2774.2(2) Å <sup>3</sup>                                                            |                 |
| Z                                 | 4                                                                                   |                 |
| Density (calculated)              | 1.404 Mg/m <sup>3</sup>                                                             |                 |
| Absorption coefficient            | 6.362 mm <sup>-1</sup>                                                              |                 |
| F(000)                            | 1224                                                                                |                 |
| Crystal size                      | 0.07 x 0.03 x 0.03 mm <sup>3</sup>                                                  |                 |
| Theta range for data collection   | 3.85 to 65.09°.                                                                     |                 |
| Index ranges                      | -12 ≤ h ≤ 14, -10 ≤ k ≤ 10, -26 ≤ l ≤ 27                                            |                 |
| Reflections collected             | 47039                                                                               |                 |
| Independent reflections           | 4496 [R(int) = 0.0852]                                                              |                 |
| Completeness to theta = 65.09°    | 95.3 %                                                                              |                 |
| Absorption correction             | Semi-empirical from equivalents                                                     |                 |
| Max. and min. transmission        | 0.8321 and 0.6644                                                                   |                 |
| Refinement method                 | Full-matrix least-squares on F <sup>2</sup>                                         |                 |
| Data / restraints / parameters    | 4496 / 1595 / 723                                                                   |                 |
| Goodness-of-fit on F <sup>2</sup> | 1.144                                                                               |                 |
| Final R indices [I > 2σ(I)]       | R1 = 0.0832, wR2 = 0.1768                                                           |                 |
| R indices (all data)              | R1 = 0.0939, wR2 = 0.1818                                                           |                 |
| Largest diff. peak and hole       | 0.387 and -0.468 e.Å <sup>-3</sup>                                                  |                 |

**Table S7.** Atomic coordinates (x 10<sup>4</sup>) and Biso/Beq (Å<sup>2</sup>x 10<sup>3</sup>) for {BnN(CH<sub>2</sub>CH<sub>2</sub>-*N*-methylbenzimidazole-2-ylidene)<sub>2</sub>}FeCl<sub>2</sub> (3)

| Atom   | x         | y         | z        | U(eq) |
|--------|-----------|-----------|----------|-------|
| Cl(1)  | 11484(9)  | 10752(9)  | 883(5)   | 59(2) |
| Cl(2)  | 13040(3)  | 7567(5)   | 1240(2)  | 62(1) |
| Fe(1)  | 11438(5)  | 8558(7)   | 1345(4)  | 54(1) |
| C(1)   | 11070(14) | 8840(18)  | 2229(5)  | 48(2) |
| N(1)   | 10425(15) | 9850(20)  | 2462(6)  | 57(3) |
| C(8)   | 9819(15)  | 10936(19) | 2151(9)  | 91(5) |
| C(2)   | 10360(20) | 9690(20)  | 3064(6)  | 60(3) |
| C(3)   | 9825(18)  | 10460(20) | 3464(6)  | 72(3) |
| C(4)   | 9936(16)  | 10040(19) | 4040(6)  | 74(4) |
| C(5)   | 10593(17) | 8922(18)  | 4206(6)  | 73(4) |
| C(6)   | 11120(20) | 8140(20)  | 3801(7)  | 65(3) |
| C(7)   | 10990(20) | 8550(30)  | 3216(6)  | 57(2) |
| N(2)   | 11400(20) | 8050(20)  | 2694(6)  | 55(2) |
| C(9)   | 12005(14) | 6740(17)  | 2638(9)  | 65(3) |
| C(10)  | 11278(7)  | 5435(11)  | 2736(4)  | 61(2) |
| N(3)   | 10553(6)  | 5198(8)   | 2247(3)  | 52(2) |
| C(21)  | 9530(7)   | 4770(10)  | 2439(4)  | 57(2) |
| C(22)  | 8933(8)   | 5989(11)  | 2694(4)  | 50(2) |
| C(23)  | 8545(10)  | 7077(14)  | 2355(5)  | 55(2) |
| C(24)  | 7975(9)   | 8179(12)  | 2582(5)  | 71(2) |
| C(25)  | 7790(10)  | 8242(13)  | 3162(5)  | 81(3) |
| C(26)  | 8173(11)  | 7175(13)  | 3521(5)  | 85(3) |
| C(27)  | 8776(11)  | 6067(14)  | 3300(5)  | 74(3) |
| C(11)  | 10951(8)  | 4207(10)  | 1796(4)  | 58(2) |
| C(12)  | 11240(12) | 4992(16)  | 1221(7)  | 47(3) |
| N(4)   | 10356(11) | 5763(12)  | 989(8)   | 37(2) |
| C(13)  | 9471(10)  | 5128(13)  | 734(8)   | 35(2) |
| C(14)  | 9206(10)  | 3723(13)  | 578(9)   | 40(3) |
| C(15)  | 8280(10)  | 3505(15)  | 282(9)   | 42(3) |
| C(16)  | 7640(10)  | 4666(14)  | 153(8)   | 44(3) |
| C(17)  | 7892(11)  | 6049(14)  | 307(8)   | 40(3) |
| C(18)  | 8813(9)   | 6265(13)  | 593(8)   | 35(2) |
| N(5)   | 9313(8)   | 7505(13)  | 771(8)   | 38(2) |
| C(19)  | 10250(9)  | 7221(11)  | 1014(8)  | 36(2) |
| C(20)  | 8839(10)  | 8925(15)  | 716(7)   | 46(3) |
| Cl(1A) | 11204(13) | 10774(13) | 934(9)   | 53(3) |
| Cl(2A) | 13132(5)  | 8116(8)   | 1373(4)  | 70(2) |
| Fe(1A) | 11419(7)  | 8600(11)  | 1389(5)  | 50(2) |
| C(1A)  | 11010(20) | 8630(30)  | 2276(7)  | 52(3) |
| N(1A)  | 11440(30) | 7850(30)  | 2723(9)  | 52(3) |
| C(8A)  | 12130(30) | 6600(30)  | 2705(15) | 78(6) |
| C(2A)  | 11070(40) | 8300(40)  | 3253(9)  | 54(3) |
| C(3A)  | 11290(30) | 7830(40)  | 3799(9)  | 60(4) |
| C(4A)  | 10750(30) | 8460(30)  | 4240(9)  | 61(4) |
| C(5A)  | 10080(20) | 9610(30)  | 4149(8)  | 61(4) |
| C(6A)  | 9890(30)  | 10140(30) | 3595(9)  | 63(4) |
| C(7A)  | 10410(30) | 9440(40)  | 3139(8)  | 55(3) |
| N(2A)  | 10410(20) | 9620(30)  | 2532(8)  | 53(3) |
| C(9A)  | 9761(16)  | 10570(20) | 2188(13) | 63(4) |
| C(10A) | 8651(10)  | 9979(14)  | 2109(6)  | 54(3) |
| N(3A)  | 8536(9)   | 8730(11)  | 1729(4)  | 51(2) |
| C(21A) | 7876(11)  | 7635(15)  | 1989(6)  | 60(3) |
| C(22A) | 8379(17)  | 6870(20)  | 2494(7)  | 57(3) |
| C(23A) | 9170(12)  | 5916(17)  | 2429(6)  | 51(3) |

|        |           |          |          |       |
|--------|-----------|----------|----------|-------|
| C(24A) | 9614(12)  | 5200(16) | 2894(6)  | 57(3) |
| C(25A) | 9284(14)  | 5428(19) | 3450(6)  | 70(3) |
| C(26A) | 8462(17)  | 6350(20) | 3531(7)  | 82(4) |
| C(27A) | 8005(14)  | 7090(20) | 3065(6)  | 77(3) |
| C(11A) | 8218(10)  | 9033(14) | 1114(5)  | 44(3) |
| C(12A) | 9121(16)  | 8740(20) | 692(9)   | 41(3) |
| N(4A)  | 9538(13)  | 7297(19) | 751(12)  | 33(2) |
| C(13A) | 9035(14)  | 6040(20) | 554(13)  | 34(3) |
| C(14A) | 8095(16)  | 5760(20) | 256(13)  | 38(3) |
| C(15A) | 7886(15)  | 4340(20) | 119(12)  | 39(3) |
| C(16A) | 8567(15)  | 3250(20) | 275(13)  | 39(4) |
| C(17A) | 9493(16)  | 3510(20) | 570(14)  | 38(3) |
| C(18A) | 9697(15)  | 4913(19) | 696(13)  | 33(3) |
| N(5A)  | 10527(18) | 5512(18) | 998(13)  | 38(3) |
| C(19A) | 10454(12) | 6984(17) | 1022(13) | 34(3) |
| C(20A) | 11330(20) | 4650(20) | 1275(12) | 48(4) |
| O(1S)  | 8922(12)  | 3827(17) | 4661(8)  | 83(4) |
| C(1S)  | 9927(16)  | 3670(20) | 4501(11) | 86(5) |
| C(2S)  | 10545(16) | 4860(30) | 4845(14) | 84(5) |
| C(3S)  | 9654(16)  | 5960(20) | 4979(12) | 74(4) |
| C(4S)  | 8715(16)  | 4910(20) | 5043(13) | 81(5) |
| O(1T)  | 10150(30) | 4430(40) | 4643(16) | 85(5) |
| C(1T)  | 11000(30) | 4770(50) | 4990(30) | 82(6) |
| C(2T)  | 10720(30) | 6310(50) | 5220(30) | 74(6) |
| C(3T)  | 9510(30)  | 6390(40) | 5120(20) | 70(6) |
| C(4T)  | 9250(30)  | 4810(50) | 4920(20) | 81(5) |

$$\text{Beq} = 8/3 \pi^2 (U_{11}(\text{aa}^*)^2 + U_{22}(\text{bb}^*)^2 + U_{33}(\text{cc}^*)^2 + 2U_{12}(\text{aa}^*\text{bb}^*)\cos g + 2U_{13}(\text{aa}^*\text{cc}^*)\cos b + 2U_{23}(\text{bb}^*\text{cc}^*)\cos a)$$

**Table S8.** Anisotropic displacement parameters ( $\text{\AA}^2 \times 10^3$ ) for **{BnN(CH<sub>2</sub>CH<sub>2</sub>-N-methylbenzimidazole-2-ylidene)<sub>2</sub>}FeCl<sub>2</sub> (3)**

| Atom  | U <sup>11</sup> | U <sup>22</sup> | U <sup>33</sup> | U <sup>23</sup> | U <sup>13</sup> | U <sup>12</sup> |
|-------|-----------------|-----------------|-----------------|-----------------|-----------------|-----------------|
| Cl(1) | 77(6)           | 57(2)           | 43(3)           | 1(2)            | 10(3)           | -25(2)          |
| Cl(2) | 51(2)           | 76(3)           | 61(2)           | -8(2)           | 3(1)            | -21(2)          |
| Fe(1) | 61(2)           | 63(2)           | 38(2)           | 5(2)            | 2(2)            | -19(2)          |
| C(1)  | 48(5)           | 56(6)           | 39(3)           | 8(3)            | -5(3)           | -18(4)          |
| N(1)  | 61(5)           | 72(7)           | 38(4)           | 3(4)            | -2(4)           | -10(4)          |
| C(8)  | 108(10)         | 98(11)          | 68(7)           | 22(8)           | 11(8)           | 28(7)           |
| C(2)  | 64(5)           | 77(8)           | 37(4)           | 0(4)            | -1(4)           | -21(5)          |
| C(3)  | 82(7)           | 94(9)           | 39(5)           | 1(5)            | 2(6)            | -10(6)          |
| C(4)  | 90(8)           | 95(10)          | 37(5)           | -3(6)           | -3(6)           | -15(6)          |
| C(5)  | 86(9)           | 93(11)          | 38(4)           | 0(5)            | -11(5)          | -22(7)          |
| C(6)  | 70(8)           | 85(9)           | 40(3)           | 3(4)            | -14(4)          | -24(5)          |
| C(7)  | 55(6)           | 77(7)           | 37(3)           | 5(4)            | -9(4)           | -28(5)          |
| N(2)  | 53(5)           | 72(5)           | 39(3)           | 10(4)           | -8(4)           | -16(4)          |
| C(9)  | 67(7)           | 83(6)           | 44(6)           | 19(5)           | -15(5)          | 0(3)            |
| C(10) | 64(5)           | 72(5)           | 47(4)           | 21(4)           | -3(4)           | 10(4)           |
| N(3)  | 50(4)           | 61(4)           | 45(3)           | 11(3)           | 3(3)            | 16(3)           |
| C(21) | 60(4)           | 56(5)           | 56(5)           | -2(4)           | 14(4)           | 5(4)            |
| C(22) | 48(5)           | 49(4)           | 54(4)           | -5(4)           | 8(4)            | -3(3)           |
| C(23) | 45(6)           | 58(5)           | 61(5)           | 2(4)            | 7(4)            | 1(4)            |
| C(24) | 69(6)           | 64(5)           | 79(4)           | 6(4)            | 15(5)           | 15(4)           |
| C(25) | 95(7)           | 71(6)           | 79(5)           | -9(5)           | 11(6)           | 28(5)           |
| C(26) | 110(8)          | 82(7)           | 63(5)           | -10(4)          | 17(5)           | 35(6)           |



|        |        |        |        |         |        |        |
|--------|--------|--------|--------|---------|--------|--------|
| C(27)  | 87(7)  | 78(6)  | 57(4)  | -1(4)   | 18(5)  | 29(5)  |
| C(11)  | 64(6)  | 62(5)  | 48(4)  | 18(3)   | 14(4)  | 27(4)  |
| C(12)  | 49(5)  | 48(6)  | 45(5)  | 14(5)   | 4(4)   | 24(4)  |
| N(4)   | 30(5)  | 42(4)  | 39(4)  | 4(4)    | 5(4)   | 12(3)  |
| C(13)  | 32(5)  | 38(4)  | 35(4)  | -8(4)   | 15(4)  | 14(3)  |
| C(14)  | 31(7)  | 37(4)  | 53(5)  | -4(4)   | 18(6)  | 12(4)  |
| C(15)  | 35(7)  | 39(5)  | 53(5)  | -16(5)  | 15(6)  | 10(5)  |
| C(16)  | 33(6)  | 46(6)  | 51(5)  | -15(5)  | 6(5)   | 10(4)  |
| C(17)  | 36(6)  | 39(5)  | 45(5)  | -14(4)  | 5(5)   | 15(4)  |
| C(18)  | 30(5)  | 38(4)  | 36(4)  | -3(4)   | 8(5)   | 12(3)  |
| N(5)   | 37(5)  | 36(4)  | 39(4)  | 4(4)    | -1(4)  | 11(3)  |
| C(19)  | 39(4)  | 37(4)  | 33(4)  | 6(4)    | 0(4)   | 11(3)  |
| C(20)  | 42(8)  | 38(4)  | 57(6)  | 2(5)    | -2(6)  | 18(5)  |
| Cl(1A) | 69(7)  | 45(2)  | 47(4)  | 5(2)    | 17(4)  | -15(3) |
| Cl(2A) | 47(3)  | 84(5)  | 78(5)  | 23(3)   | 0(2)   | -15(3) |
| Fe(1A) | 48(3)  | 65(4)  | 37(3)  | 12(3)   | -9(3)  | -8(3)  |
| C(1A)  | 57(6)  | 61(7)  | 37(3)  | 5(3)    | -7(4)  | -16(5) |
| N(1A)  | 55(6)  | 63(7)  | 36(3)  | 8(4)    | -4(5)  | -16(5) |
| C(8A)  | 86(13) | 84(11) | 63(12) | 17(8)   | 9(10)  | 12(8)  |
| C(2A)  | 57(6)  | 69(8)  | 37(3)  | 3(5)    | -8(5)  | -17(5) |
| C(3A)  | 68(9)  | 75(10) | 37(4)  | -3(5)   | -15(5) | -10(6) |
| C(4A)  | 73(9)  | 74(11) | 37(5)  | 2(6)    | -14(6) | -2(8)  |
| C(5A)  | 76(9)  | 73(11) | 33(5)  | 10(6)   | -8(7)  | -2(7)  |
| C(6A)  | 81(7)  | 73(9)  | 35(6)  | 14(6)   | 2(7)   | -1(6)  |
| C(7A)  | 62(6)  | 68(8)  | 36(4)  | 4(5)    | -3(5)  | -16(5) |
| N(2A)  | 57(5)  | 64(7)  | 38(4)  | 8(5)    | -2(4)  | -15(5) |
| C(9A)  | 76(7)  | 65(8)  | 49(7)  | 9(6)    | -4(6)  | -5(5)  |
| C(10A) | 59(6)  | 60(6)  | 42(6)  | -8(5)   | -1(5)  | 18(5)  |
| N(3A)  | 55(6)  | 52(5)  | 44(4)  | -5(3)   | -5(4)  | 22(4)  |
| C(21A) | 55(7)  | 67(6)  | 59(5)  | -6(5)   | -2(5)  | 9(4)   |
| C(22A) | 57(7)  | 58(6)  | 57(5)  | -3(4)   | 1(5)   | 2(5)   |
| C(23A) | 50(6)  | 50(6)  | 53(5)  | 1(6)    | 1(5)   | -4(5)  |
| C(24A) | 61(7)  | 53(6)  | 57(5)  | 4(5)    | 0(5)   | -2(5)  |
| C(25A) | 85(9)  | 71(8)  | 54(5)  | 8(6)    | 2(6)   | 7(6)   |
| C(26A) | 104(9) | 85(9)  | 57(5)  | 1(7)    | 11(6)  | 21(7)  |
| C(27A) | 90(7)  | 80(7)  | 62(5)  | -1(6)   | 10(5)  | 24(6)  |
| C(11A) | 38(7)  | 46(6)  | 49(5)  | -11(4)  | -10(4) | 24(5)  |
| C(12A) | 40(8)  | 40(5)  | 42(5)  | -3(6)   | -9(5)  | 21(6)  |
| N(4A)  | 33(5)  | 36(4)  | 31(5)  | 0(4)    | 2(5)   | 15(4)  |
| C(13A) | 26(6)  | 39(5)  | 37(6)  | -8(5)   | 10(5)  | 17(4)  |
| C(14A) | 28(7)  | 41(6)  | 44(7)  | -12(6)  | 8(6)   | 17(5)  |
| C(15A) | 28(7)  | 41(7)  | 48(6)  | -14(6)  | 14(6)  | 13(6)  |
| C(16A) | 28(8)  | 39(6)  | 50(6)  | -4(6)   | 20(7)  | 13(5)  |
| C(17A) | 30(8)  | 38(5)  | 47(6)  | -6(5)   | 19(7)  | 15(5)  |
| C(18A) | 27(6)  | 37(4)  | 35(6)  | -3(5)   | 16(6)  | 18(4)  |
| N(5A)  | 36(6)  | 40(4)  | 39(5)  | 1(5)    | 2(5)   | 19(4)  |
| C(19A) | 35(5)  | 37(4)  | 31(5)  | 4(5)    | 1(5)   | 16(4)  |
| C(20A) | 52(8)  | 42(9)  | 51(9)  | 18(8)   | -5(7)  | 19(7)  |
| O(1S)  | 86(9)  | 81(7)  | 85(9)  | -21(6)  | 35(7)  | -18(7) |
| C(1S)  | 83(9)  | 84(9)  | 92(10) | -30(7)  | 28(9)  | -10(8) |
| C(2S)  | 81(8)  | 89(9)  | 85(10) | -33(8)  | 31(9)  | -10(7) |
| C(3S)  | 78(9)  | 75(8)  | 70(10) | -13(7)  | 31(8)  | -13(7) |
| C(4S)  | 83(9)  | 78(9)  | 84(10) | -17(7)  | 39(9)  | -17(8) |
| O(1T)  | 82(10) | 86(10) | 88(11) | -34(8)  | 31(9)  | -13(9) |
| C(1T)  | 80(10) | 86(12) | 80(13) | -36(11) | 33(11) | -7(10) |
| C(2T)  | 74(11) | 77(10) | 72(12) | -24(9)  | 36(11) | -11(9) |

|       |        |        |        |         |        |        |
|-------|--------|--------|--------|---------|--------|--------|
| C(3T) | 74(11) | 77(10) | 59(13) | -14(10) | 37(11) | -13(9) |
| C(4T) | 80(9)  | 83(9)  | 81(10) | -24(8)  | 32(9)  | -16(8) |

The general temperature factor expression:  $\exp(-2\pi^2(a^*U_{11}h^2 + b^*U_{22}k^2 + c^*U_{33}l^2 + 2a*b*U_{12}hk + 2a*c*U_{13}hl + 2b*c*U_{23}kl))$

**Table S9.** Bond lengths (Å) for **{BnN(CH<sub>2</sub>CH<sub>2</sub>-N-methylbenzimidazole-2-ylidene)<sub>2</sub>}FeCl<sub>2</sub> (3)**

|               |           |
|---------------|-----------|
| Cl(1)-Fe(1)   | 2.308(7)  |
| Cl(2)-Fe(1)   | 2.287(7)  |
| Fe(1)-C(19)   | 2.110(8)  |
| Fe(1)-C(1)    | 2.113(8)  |
| C(1)-N(2)     | 1.360(12) |
| C(1)-N(1)     | 1.373(13) |
| N(1)-C(2)     | 1.394(13) |
| N(1)-C(8)     | 1.462(12) |
| C(2)-C(3)     | 1.369(14) |
| C(2)-C(7)     | 1.383(11) |
| C(3)-C(4)     | 1.386(13) |
| C(4)-C(5)     | 1.394(12) |
| C(5)-C(6)     | 1.373(14) |
| C(6)-C(7)     | 1.402(13) |
| C(7)-N(2)     | 1.400(13) |
| N(2)-C(9)     | 1.457(13) |
| C(9)-C(10)    | 1.559(18) |
| C(10)-N(3)    | 1.466(9)  |
| N(3)-C(21)    | 1.459(11) |
| N(3)-C(11)    | 1.489(9)  |
| C(21)-C(22)   | 1.501(12) |
| C(22)-C(23)   | 1.369(11) |
| C(22)-C(27)   | 1.412(14) |
| C(23)-C(24)   | 1.375(14) |
| C(24)-C(25)   | 1.358(13) |
| C(25)-C(26)   | 1.379(14) |
| C(26)-C(27)   | 1.399(13) |
| C(11)-C(12)   | 1.562(16) |
| C(12)-N(4)    | 1.445(11) |
| N(4)-C(19)    | 1.369(11) |
| N(4)-C(13)    | 1.406(12) |
| C(13)-C(18)   | 1.395(9)  |
| C(13)-C(14)   | 1.401(13) |
| C(14)-C(15)   | 1.381(12) |
| C(15)-C(16)   | 1.393(10) |
| C(16)-C(17)   | 1.376(12) |
| C(17)-C(18)   | 1.364(13) |
| C(18)-N(5)    | 1.385(12) |
| N(5)-C(19)    | 1.350(11) |
| N(5)-C(20)    | 1.465(10) |
| Cl(1A)-Fe(1A) | 2.297(10) |
| Cl(2A)-Fe(1A) | 2.263(9)  |
| Fe(1A)-C(1A)  | 2.112(11) |
| Fe(1A)-C(19A) | 2.123(11) |
| C(1A)-N(2A)   | 1.354(15) |
| C(1A)-N(1A)   | 1.369(15) |

|               |           |
|---------------|-----------|
| N(1A)-C(2A)   | 1.383(17) |
| N(1A)-C(8A)   | 1.466(15) |
| C(2A)-C(3A)   | 1.356(16) |
| C(2A)-C(7A)   | 1.382(12) |
| C(3A)-C(4A)   | 1.377(16) |
| C(4A)-C(5A)   | 1.399(14) |
| C(5A)-C(6A)   | 1.379(15) |
| C(6A)-C(7A)   | 1.414(16) |
| C(7A)-N(2A)   | 1.406(15) |
| N(2A)-C(9A)   | 1.443(15) |
| C(9A)-C(10A)  | 1.546(19) |
| C(10A)-N(3A)  | 1.463(11) |
| N(3A)-C(21A)  | 1.467(14) |
| N(3A)-C(11A)  | 1.489(11) |
| C(21A)-C(22A) | 1.499(16) |
| C(22A)-C(23A) | 1.370(14) |
| C(22A)-C(27A) | 1.421(17) |
| C(23A)-C(24A) | 1.376(16) |
| C(24A)-C(25A) | 1.370(16) |
| C(25A)-C(26A) | 1.385(17) |
| C(26A)-C(27A) | 1.394(16) |
| C(11A)-C(12A) | 1.557(17) |
| C(12A)-N(4A)  | 1.458(13) |
| N(4A)-C(19A)  | 1.359(14) |
| N(4A)-C(13A)  | 1.411(16) |
| C(13A)-C(18A) | 1.392(11) |
| C(13A)-C(14A) | 1.409(16) |
| C(14A)-C(15A) | 1.385(15) |
| C(15A)-C(16A) | 1.389(13) |
| C(16A)-C(17A) | 1.387(15) |
| C(17A)-C(18A) | 1.362(16) |
| C(18A)-N(5A)  | 1.384(16) |
| N(5A)-C(19A)  | 1.378(14) |
| N(5A)-C(20A)  | 1.453(13) |
| O(1S)-C(1S)   | 1.37(2)   |
| O(1S)-C(4S)   | 1.37(2)   |
| C(1S)-C(2S)   | 1.57(2)   |
| C(2S)-C(3S)   | 1.58(2)   |
| C(3S)-C(4S)   | 1.57(2)   |
| O(1T)-C(1T)   | 1.38(2)   |
| O(1T)-C(4T)   | 1.39(2)   |
| C(1T)-C(2T)   | 1.58(2)   |
| C(2T)-C(3T)   | 1.57(2)   |
| C(3T)-C(4T)   | 1.58(2)   |

**Table S10.** Bond angles (°) for {BnN(CH<sub>2</sub>CH<sub>2</sub>-*N*-methylbenzimidazole-2-ylidene)<sub>2</sub>}FeCl<sub>2</sub> (**3**)

|                   |          |
|-------------------|----------|
| C(19)-Fe(1)-C(1)  | 104.1(6) |
| C(19)-Fe(1)-Cl(2) | 112.2(4) |
| C(1)-Fe(1)-Cl(2)  | 111.9(5) |
| C(19)-Fe(1)-Cl(1) | 112.6(5) |
| C(1)-Fe(1)-Cl(1)  | 109.9(5) |
| Cl(2)-Fe(1)-Cl(1) | 106.2(3) |
| N(2)-C(1)-N(1)    | 104.5(7) |

|                      |           |
|----------------------|-----------|
| N(2)-C(1)-Fe(1)      | 127.8(9)  |
| N(1)-C(1)-Fe(1)      | 127.6(8)  |
| C(1)-N(1)-C(2)       | 111.2(9)  |
| C(1)-N(1)-C(8)       | 127.5(11) |
| C(2)-N(1)-C(8)       | 121.2(11) |
| C(3)-C(2)-C(7)       | 122.9(11) |
| C(3)-C(2)-N(1)       | 130.5(11) |
| C(7)-C(2)-N(1)       | 106.6(11) |
| C(2)-C(3)-C(4)       | 116.5(11) |
| C(3)-C(4)-C(5)       | 121.6(12) |
| C(6)-C(5)-C(4)       | 121.4(11) |
| C(5)-C(6)-C(7)       | 117.1(11) |
| C(2)-C(7)-N(2)       | 105.8(10) |
| C(2)-C(7)-C(6)       | 120.4(12) |
| N(2)-C(7)-C(6)       | 133.8(11) |
| C(1)-N(2)-C(7)       | 111.9(9)  |
| C(1)-N(2)-C(9)       | 123.2(11) |
| C(7)-N(2)-C(9)       | 124.5(11) |
| N(2)-C(9)-C(10)      | 108.6(15) |
| N(3)-C(10)-C(9)      | 112.7(9)  |
| C(21)-N(3)-C(10)     | 112.3(7)  |
| C(21)-N(3)-C(11)     | 111.6(7)  |
| C(10)-N(3)-C(11)     | 113.7(7)  |
| N(3)-C(21)-C(22)     | 112.7(8)  |
| C(23)-C(22)-C(27)    | 117.7(10) |
| C(23)-C(22)-C(21)    | 121.8(10) |
| C(27)-C(22)-C(21)    | 120.5(9)  |
| C(22)-C(23)-C(24)    | 122.1(11) |
| C(25)-C(24)-C(23)    | 120.7(11) |
| C(24)-C(25)-C(26)    | 119.2(10) |
| C(25)-C(26)-C(27)    | 120.8(10) |
| C(26)-C(27)-C(22)    | 119.3(10) |
| N(3)-C(11)-C(12)     | 112.9(9)  |
| N(4)-C(12)-C(11)     | 110.3(13) |
| C(19)-N(4)-C(13)     | 110.8(7)  |
| C(19)-N(4)-C(12)     | 124.0(9)  |
| C(13)-N(4)-C(12)     | 125.1(9)  |
| C(18)-C(13)-C(14)    | 120.5(10) |
| C(18)-C(13)-N(4)     | 105.3(9)  |
| C(14)-C(13)-N(4)     | 134.0(9)  |
| C(15)-C(14)-C(13)    | 118.0(9)  |
| C(14)-C(15)-C(16)    | 119.8(10) |
| C(17)-C(16)-C(15)    | 122.6(10) |
| C(18)-C(17)-C(16)    | 117.6(9)  |
| C(17)-C(18)-N(5)     | 131.6(9)  |
| C(17)-C(18)-C(13)    | 121.6(10) |
| N(5)-C(18)-C(13)     | 106.7(9)  |
| C(19)-N(5)-C(18)     | 111.6(7)  |
| C(19)-N(5)-C(20)     | 125.7(9)  |
| C(18)-N(5)-C(20)     | 122.6(9)  |
| N(5)-C(19)-N(4)      | 105.5(7)  |
| N(5)-C(19)-Fe(1)     | 132.4(7)  |
| N(4)-C(19)-Fe(1)     | 122.0(7)  |
| C(1A)-Fe(1A)-C(19A)  | 103.7(9)  |
| C(1A)-Fe(1A)-Cl(2A)  | 106.3(8)  |
| C(19A)-Fe(1A)-Cl(2A) | 114.8(7)  |

|                      |           |
|----------------------|-----------|
| C(1A)-Fe(1A)-Cl(1A)  | 113.3(7)  |
| C(19A)-Fe(1A)-Cl(1A) | 112.4(7)  |
| Cl(2A)-Fe(1A)-Cl(1A) | 106.2(5)  |
| N(2A)-C(1A)-N(1A)    | 105.5(10) |
| N(2A)-C(1A)-Fe(1A)   | 125.8(12) |
| N(1A)-C(1A)-Fe(1A)   | 127.7(13) |
| C(1A)-N(1A)-C(2A)    | 110.9(12) |
| C(1A)-N(1A)-C(8A)    | 129.7(16) |
| C(2A)-N(1A)-C(8A)    | 119.2(16) |
| C(3A)-C(2A)-C(7A)    | 123.1(15) |
| C(3A)-C(2A)-N(1A)    | 129.9(15) |
| C(7A)-C(2A)-N(1A)    | 106.9(13) |
| C(2A)-C(3A)-C(4A)    | 115.9(14) |
| C(3A)-C(4A)-C(5A)    | 123.1(15) |
| C(6A)-C(5A)-C(4A)    | 120.4(14) |
| C(5A)-C(6A)-C(7A)    | 116.4(13) |
| C(2A)-C(7A)-N(2A)    | 105.8(13) |
| C(2A)-C(7A)-C(6A)    | 120.9(14) |
| N(2A)-C(7A)-C(6A)    | 133.3(14) |
| C(1A)-N(2A)-C(7A)    | 110.9(11) |
| C(1A)-N(2A)-C(9A)    | 121.0(15) |
| C(7A)-N(2A)-C(9A)    | 127.5(15) |
| N(2A)-C(9A)-C(10A)   | 111.8(18) |
| N(3A)-C(10A)-C(9A)   | 115.9(14) |
| C(10A)-N(3A)-C(21A)  | 111.4(10) |
| C(10A)-N(3A)-C(11A)  | 115.9(10) |
| C(21A)-N(3A)-C(11A)  | 111.4(10) |
| N(3A)-C(21A)-C(22A)  | 113.5(14) |
| C(23A)-C(22A)-C(27A) | 117.5(13) |
| C(23A)-C(22A)-C(21A) | 122.6(14) |
| C(27A)-C(22A)-C(21A) | 119.8(13) |
| C(22A)-C(23A)-C(24A) | 122.2(14) |
| C(25A)-C(24A)-C(23A) | 121.0(14) |
| C(24A)-C(25A)-C(26A) | 118.5(14) |
| C(25A)-C(26A)-C(27A) | 121.3(15) |
| C(26A)-C(27A)-C(22A) | 119.4(14) |
| N(3A)-C(11A)-C(12A)  | 111.1(11) |
| N(4A)-C(12A)-C(11A)  | 112.6(15) |
| C(19A)-N(4A)-C(13A)  | 111.1(10) |
| C(19A)-N(4A)-C(12A)  | 124.0(13) |
| C(13A)-N(4A)-C(12A)  | 124.8(13) |
| C(18A)-C(13A)-C(14A) | 119.5(13) |
| C(18A)-C(13A)-N(4A)  | 106.0(12) |
| C(14A)-C(13A)-N(4A)  | 134.5(12) |
| C(15A)-C(14A)-C(13A) | 116.9(12) |
| C(14A)-C(15A)-C(16A) | 121.4(14) |
| C(17A)-C(16A)-C(15A) | 122.2(14) |
| C(18A)-C(17A)-C(16A) | 115.9(12) |
| C(17A)-C(18A)-N(5A)  | 129.7(13) |
| C(17A)-C(18A)-C(13A) | 124.0(14) |
| N(5A)-C(18A)-C(13A)  | 106.2(12) |
| C(19A)-N(5A)-C(18A)  | 111.7(10) |
| C(19A)-N(5A)-C(20A)  | 125.8(13) |
| C(18A)-N(5A)-C(20A)  | 122.4(13) |
| N(4A)-C(19A)-N(5A)   | 104.8(9)  |
| N(4A)-C(19A)-Fe(1A)  | 122.0(10) |

|                     |           |
|---------------------|-----------|
| N(5A)-C(19A)-Fe(1A) | 133.2(10) |
| C(1S)-O(1S)-C(4S)   | 116.8(15) |
| O(1S)-C(1S)-C(2S)   | 105.5(13) |
| C(1S)-C(2S)-C(3S)   | 101.0(13) |
| C(4S)-C(3S)-C(2S)   | 100.5(14) |
| O(1S)-C(4S)-C(3S)   | 103.8(14) |
| C(1T)-O(1T)-C(4T)   | 110(3)    |
| O(1T)-C(1T)-C(2T)   | 102.4(19) |
| C(3T)-C(2T)-C(1T)   | 103.2(14) |
| C(2T)-C(3T)-C(4T)   | 101.9(15) |
| O(1T)-C(4T)-C(3T)   | 100.7(19) |

**X-Ray Data for {BnN(CH<sub>2</sub>CH<sub>2</sub>CH<sub>2</sub>-N-methylbenzimidazole-2-ylidene)<sub>2</sub>}FeCl<sub>2</sub> (4)**

**Table S11.** Crystal data and structure refinement for {BnN(CH<sub>2</sub>CH<sub>2</sub>CH<sub>2</sub>-N-methylbenzimidazole-2-ylidene)<sub>2</sub>}FeCl<sub>2</sub> (4)

|                                   |                                             |                |
|-----------------------------------|---------------------------------------------|----------------|
| Empirical formula                 | C32 H36 Cl2 Fe N5                           |                |
| Formula weight                    | 617.41                                      |                |
| Temperature                       | 93(2) K                                     |                |
| Wavelength                        | 1.54187 Å                                   |                |
| Crystal system                    | Monoclinic                                  |                |
| Space group                       | P2(1)/c                                     |                |
| Unit cell dimensions              | a = 9.3137(2) Å                             | α = 90°        |
|                                   | b = 29.3333(5) Å                            | β = 98.700(7)° |
|                                   | c = 22.4626(16) Å                           | γ = 90°        |
| Volume                            | 6066.2(5) Å <sup>3</sup>                    |                |
| Z                                 | 8                                           |                |
| Density (calculated)              | 1.352 Mg/m <sup>3</sup>                     |                |
| Absorption coefficient            | 5.835 mm <sup>-1</sup>                      |                |
| F(000)                            | 2584                                        |                |
| Crystal size                      | 0.20 x 0.05 x 0.05 mm <sup>3</sup>          |                |
| Theta range for data collection   | 6.51 to 55.99°                              |                |
| Index ranges                      | -10<=h<=10, -31<=k<=31, -24<=l<=24          |                |
| Reflections collected             | 74851                                       |                |
| Independent reflections           | 7859 [R(int) = 0.1618]                      |                |
| Completeness to theta             | = 55.99° 99.7 %                             |                |
| Absorption correction             | Semi-empirical from equivalents             |                |
| Max. and min. transmission        | 0.7591 and 0.3882                           |                |
| Refinement method                 | Full-matrix least-squares on F <sup>2</sup> |                |
| Data / restraints / parameters    | 7859 / 254 / 741                            |                |
| Goodness-of-fit on F <sup>2</sup> | 1.078                                       |                |
| Final R indices [I>2sigma(I)]     | R1 = 0.0626, wR2 = 0.1619                   |                |
| R indices (all data)              | R1 = 0.0766, wR2 = 0.1716                   |                |
| Largest diff. peak and hole       | 0.769 and -0.542 e.Å <sup>-3</sup>          |                |

**Table S12.** Atomic coordinates (x 10<sup>4</sup>) and Bisoi/Beq (Å<sup>2</sup> x 10<sup>3</sup>) for {BnN(CH<sub>2</sub>CH<sub>2</sub>CH<sub>2</sub>-N-methylbenzimidazole-2-ylidene)<sub>2</sub>}FeCl<sub>2</sub> (4)

| Atom  | x       | y       | z       | U(eq) |
|-------|---------|---------|---------|-------|
| Cl(1) | 3033(1) | 5824(1) | 1382(1) | 46(1) |
| Cl(2) | 451(1)  | 5378(1) | 2339(1) | 41(1) |
| Fe(1) | 2786(1) | 5346(1) | 2160(1) | 36(1) |
| C(1)  | 3414(5) | 4673(2) | 2005(2) | 44(1) |

|        |          |         |         |       |
|--------|----------|---------|---------|-------|
| N(1)   | 4105(4)  | 4496(1) | 1559(2) | 48(1) |
| C(21)  | 4369(7)  | 4736(2) | 1019(2) | 65(2) |
| C(2)   | 4500(5)  | 4045(2) | 1675(2) | 51(1) |
| C(3)   | 5222(5)  | 3733(2) | 1360(3) | 57(1) |
| C(4)   | 5423(6)  | 3306(2) | 1596(3) | 59(2) |
| C(5)   | 4946(5)  | 3188(2) | 2138(3) | 58(2) |
| C(6)   | 4241(5)  | 3502(2) | 2460(3) | 51(1) |
| C(7)   | 4029(5)  | 3934(2) | 2215(2) | 42(1) |
| N(2)   | 3377(4)  | 4324(1) | 2402(2) | 39(1) |
| C(8)   | 2718(5)  | 4357(2) | 2954(2) | 42(1) |
| C(9)   | 3791(5)  | 4350(2) | 3526(2) | 44(1) |
| C(10)  | 3006(5)  | 4393(2) | 4071(2) | 44(1) |
| N(3)   | 2324(4)  | 4845(1) | 4098(2) | 39(1) |
| C(22)  | 1059(5)  | 4815(2) | 4418(2) | 44(1) |
| C(23)  | -153(5)  | 4530(2) | 4102(2) | 41(1) |
| C(24)  | -700(5)  | 4597(2) | 3493(2) | 44(1) |
| C(25)  | -1822(5) | 4330(2) | 3207(2) | 51(1) |
| C(26)  | -2448(5) | 3993(2) | 3524(3) | 51(1) |
| C(27)  | -1926(5) | 3928(2) | 4123(2) | 47(1) |
| C(28)  | -781(5)  | 4186(2) | 4407(2) | 40(1) |
| C(11)  | 3381(5)  | 5172(2) | 4399(2) | 45(1) |
| C(12)  | 2974(5)  | 5668(2) | 4292(2) | 41(1) |
| C(13)  | 2969(5)  | 5842(2) | 3655(2) | 38(1) |
| N(4)   | 4333(4)  | 5754(1) | 3418(2) | 34(1) |
| C(14)  | 5708(4)  | 5884(2) | 3698(2) | 34(1) |
| C(15)  | 6189(5)  | 6143(2) | 4204(2) | 38(1) |
| C(16)  | 7658(5)  | 6222(2) | 4337(2) | 42(1) |
| C(17)  | 8636(5)  | 6057(2) | 3972(2) | 41(1) |
| C(18)  | 8163(5)  | 5803(2) | 3464(2) | 39(1) |
| C(19)  | 6680(5)  | 5725(1) | 3330(2) | 35(1) |
| N(5)   | 5842(4)  | 5510(1) | 2849(2) | 36(1) |
| C(29)  | 6432(5)  | 5300(2) | 2343(2) | 48(1) |
| C(20)  | 4403(5)  | 5530(1) | 2890(2) | 36(1) |
| Cl(3)  | 3588(1)  | 7161(1) | 3917(1) | 46(1) |
| Cl(4)  | 685(1)   | 7043(1) | 4931(1) | 50(1) |
| Fe(2)  | 1277(1)  | 7328(1) | 4056(1) | 36(1) |
| C(101) | 1153(5)  | 8050(2) | 4088(2) | 38(1) |
| N(101) | 1833(4)  | 8311(1) | 4552(2) | 41(1) |
| C(121) | 2710(6)  | 8122(2) | 5089(2) | 55(1) |
| C(102) | 1576(5)  | 8772(2) | 4442(2) | 43(1) |
| C(103) | 1990(6)  | 9157(2) | 4782(2) | 55(1) |
| C(104) | 1512(7)  | 9576(2) | 4536(2) | 64(2) |
| C(105) | 640(7)   | 9603(2) | 3973(3) | 68(2) |
| C(106) | 232(6)   | 9218(2) | 3635(2) | 59(1) |
| C(107) | 698(5)   | 8803(2) | 3883(2) | 44(1) |
| N(102) | 475(4)   | 8356(1) | 3683(2) | 39(1) |
| C(108) | -306(5)  | 8233(2) | 3084(2) | 40(1) |
| C(109) | 550(5)   | 8360(2) | 2589(2) | 50(1) |
| C(110) | -154(5)  | 8185(2) | 1972(2) | 49(1) |
| N(103) | -301(4)  | 7687(1) | 1925(2) | 40(1) |
| C(122) | -1041(2) | 7586(1) | 1311(1) | 46(1) |
| C(123) | -2631(2) | 7745(1) | 1192(1) | 42(3) |
| C(124) | -3129(2) | 8082(1) | 777(1)  | 50(3) |
| C(125) | -4608(2) | 8172(1) | 643(1)  | 54(3) |
| C(126) | -5588(2) | 7926(1) | 924(1)  | 53(3) |
| C(127) | -5091(2) | 7589(1) | 1340(1) | 46(3) |

|        |          |         |         |       |
|--------|----------|---------|---------|-------|
| C(128) | -3612(2) | 7498(1) | 1474(1) | 42(2) |
| C(23A) | -2641(2) | 7711(1) | 1197(1) | 39(2) |
| C(24A) | -3204(2) | 7901(1) | 644(1)  | 50(2) |
| C(25A) | -4689(2) | 7976(1) | 500(1)  | 58(2) |
| C(26A) | -5611(2) | 7861(1) | 908(1)  | 50(2) |
| C(27A) | -5048(2) | 7671(1) | 1462(1) | 46(2) |
| C(28A) | -3563(2) | 7596(1) | 1606(1) | 38(2) |
| C(111) | 1136(2)  | 7470(1) | 2009(1) | 51(1) |
| C(112) | 1139(5)  | 6952(2) | 2017(2) | 49(1) |
| C(113) | 1031(5)  | 6733(2) | 2626(2) | 44(1) |
| N(104) | -308(4)  | 6844(1) | 2867(2) | 37(1) |
| C(114) | -1694(5) | 6722(2) | 2593(2) | 36(1) |
| C(115) | -2175(5) | 6461(2) | 2086(2) | 43(1) |
| C(116) | -3654(5) | 6404(2) | 1947(2) | 44(1) |
| C(117) | -4621(5) | 6584(2) | 2303(2) | 41(1) |
| C(118) | -4130(5) | 6836(2) | 2813(2) | 38(1) |
| C(119) | -2651(4) | 6901(1) | 2948(2) | 33(1) |
| N(105) | -1799(4) | 7129(1) | 3418(2) | 34(1) |
| C(129) | -2398(5) | 7386(2) | 3882(2) | 41(1) |
| C(120) | -353(5)  | 7094(2) | 3383(2) | 40(1) |
| C(1S)  | 6435(7)  | 6184(3) | 296(3)  | 77(2) |
| C(2S)  | 7337(8)  | 5859(2) | 603(3)  | 74(2) |
| C(3S)  | 8799(7)  | 5932(2) | 722(3)  | 68(2) |
| C(4S)  | 9364(7)  | 6334(2) | 538(3)  | 67(2) |
| C(5S)  | 8491(8)  | 6654(2) | 232(3)  | 74(2) |
| C(6S)  | 7040(7)  | 6585(2) | 110(3)  | 75(2) |

$$\text{Beq} = 8/3 \pi^2 (U_{11}(\text{aa}^*)^2 + U_{22}(\text{bb}^*)^2 + U_{33}(\text{cc}^*)^2 + 2U_{12}(\text{aa}^*\text{bb}^*)\cos g + 2U_{13}(\text{aa}^*\text{cc}^*)\cos b + 2U_{23}(\text{bb}^*\text{cc}^*)\cos a)$$

**Table S13.** Anisotropic displacement parameters ( $\text{\AA}^2 \times 10^3$ ) for **{BnN(CH<sub>2</sub>CH<sub>2</sub>CH<sub>2</sub>-N-methylbenzimidazole-2-ylidene)<sub>2</sub>FeCl<sub>2</sub> (4)}**

| Atom  | U <sup>11</sup> | U <sup>22</sup> | U <sup>33</sup> | U <sup>23</sup> | U <sup>13</sup> | U <sup>12</sup> |
|-------|-----------------|-----------------|-----------------|-----------------|-----------------|-----------------|
| Cl(1) | 50(1)           | 56(1)           | 34(1)           | 3(1)            | 6(1)            | -5(1)           |
| Cl(2) | 37(1)           | 51(1)           | 37(1)           | -1(1)           | 9(1)            | 1(1)            |
| Fe(1) | 38(1)           | 42(1)           | 31(1)           | -2(1)           | 9(1)            | -1(1)           |
| C(1)  | 38(3)           | 59(3)           | 37(3)           | -8(3)           | 10(2)           | 0(2)            |
| N(1)  | 49(2)           | 54(3)           | 42(3)           | -13(2)          | 12(2)           | 1(2)            |
| C(21) | 87(4)           | 73(4)           | 42(3)           | -7(3)           | 28(3)           | 2(3)            |
| C(2)  | 43(3)           | 47(3)           | 61(4)           | -21(3)          | 5(3)            | 0(2)            |
| C(3)  | 49(3)           | 61(4)           | 62(4)           | -20(3)          | 12(3)           | 2(3)            |
| C(4)  | 51(3)           | 52(4)           | 76(4)           | -27(3)          | 10(3)           | 7(3)            |
| C(5)  | 39(3)           | 45(3)           | 87(4)           | -15(3)          | -3(3)           | -1(2)           |
| C(6)  | 40(3)           | 43(3)           | 69(4)           | -9(3)           | 7(3)            | 4(2)            |
| C(7)  | 39(3)           | 38(3)           | 49(3)           | -7(2)           | 7(2)            | 2(2)            |
| N(2)  | 42(2)           | 34(2)           | 43(2)           | 0(2)            | 15(2)           | 3(2)            |
| C(8)  | 41(3)           | 41(3)           | 46(3)           | 4(2)            | 17(2)           | 0(2)            |
| C(9)  | 39(3)           | 47(3)           | 47(3)           | 5(2)            | 13(2)           | 6(2)            |
| C(10) | 42(3)           | 45(3)           | 47(3)           | 9(2)            | 14(2)           | 6(2)            |
| N(3)  | 38(2)           | 43(2)           | 39(2)           | 6(2)            | 15(2)           | 0(2)            |
| C(22) | 43(3)           | 50(3)           | 42(3)           | 1(2)            | 16(2)           | 0(2)            |
| C(23) | 38(3)           | 42(3)           | 45(3)           | -1(2)           | 12(2)           | 4(2)            |
| C(24) | 43(3)           | 46(3)           | 45(3)           | 8(2)            | 13(2)           | 7(2)            |
| C(25) | 48(3)           | 62(4)           | 42(3)           | -1(3)           | 2(3)            | 15(3)           |
| C(26) | 34(3)           | 54(3)           | 65(4)           | -8(3)           | 9(3)            | 4(2)            |



|        |       |       |       |       |        |        |
|--------|-------|-------|-------|-------|--------|--------|
| C(27)  | 46(3) | 49(3) | 50(3) | 0(3)  | 21(3)  | -3(2)  |
| C(28)  | 37(3) | 44(3) | 41(3) | -3(2) | 15(2)  | 4(2)   |
| C(11)  | 33(3) | 60(3) | 43(3) | 6(2)  | 10(2)  | -4(2)  |
| C(12)  | 35(3) | 54(3) | 34(3) | -4(2) | 9(2)   | -5(2)  |
| C(13)  | 38(3) | 42(3) | 36(3) | -4(2) | 9(2)   | 0(2)   |
| N(4)   | 31(2) | 40(2) | 33(2) | 0(2)  | 7(2)   | 0(2)   |
| C(14)  | 32(2) | 38(3) | 31(3) | 5(2)  | 5(2)   | 0(2)   |
| C(15)  | 43(3) | 42(3) | 29(3) | 3(2)  | 8(2)   | -1(2)  |
| C(16)  | 41(3) | 48(3) | 35(3) | 1(2)  | 0(2)   | -5(2)  |
| C(17)  | 33(3) | 46(3) | 43(3) | 5(2)  | 3(2)   | -1(2)  |
| C(18)  | 37(3) | 45(3) | 35(3) | 4(2)  | 8(2)   | -1(2)  |
| C(19)  | 37(3) | 38(3) | 29(3) | 3(2)  | 3(2)   | -2(2)  |
| N(5)   | 36(2) | 45(2) | 31(2) | -1(2) | 11(2)  | 3(2)   |
| C(29)  | 41(3) | 59(3) | 45(3) | -7(2) | 13(2)  | 3(2)   |
| C(20)  | 43(3) | 32(3) | 33(3) | 4(2)  | 12(2)  | 3(2)   |
| Cl(3)  | 36(1) | 53(1) | 50(1) | -6(1) | 14(1)  | 1(1)   |
| Cl(4)  | 46(1) | 68(1) | 36(1) | 7(1)  | 9(1)   | -9(1)  |
| Fe(2)  | 35(1) | 42(1) | 33(1) | 1(1)  | 11(1)  | -1(1)  |
| C(101) | 36(3) | 45(3) | 35(3) | 1(2)  | 12(2)  | 5(2)   |
| N(101) | 50(2) | 40(2) | 32(2) | -1(2) | 4(2)   | -2(2)  |
| C(121) | 70(3) | 57(3) | 35(3) | 3(2)  | -3(3)  | 2(3)   |
| C(102) | 55(3) | 40(3) | 35(3) | -1(2) | 5(2)   | -2(2)  |
| C(103) | 79(4) | 52(4) | 33(3) | -2(3) | 5(3)   | -5(3)  |
| C(104) | 95(4) | 49(4) | 43(3) | -2(3) | -2(3)  | -7(3)  |
| C(105) | 94(4) | 45(3) | 58(4) | 2(3)  | -9(3)  | 2(3)   |
| C(106) | 78(4) | 48(4) | 47(3) | -1(3) | -5(3)  | -1(3)  |
| C(107) | 56(3) | 37(3) | 39(3) | -1(2) | 2(2)   | 0(2)   |
| N(102) | 43(2) | 40(2) | 33(2) | 2(2)  | 2(2)   | 0(2)   |
| C(108) | 42(3) | 42(3) | 34(3) | 2(2)  | -2(2)  | -3(2)  |
| C(109) | 58(3) | 54(3) | 38(3) | 2(2)  | 5(2)   | -14(2) |
| C(110) | 52(3) | 53(3) | 41(3) | 7(2)  | 3(2)   | -13(2) |
| N(103) | 36(2) | 50(3) | 35(2) | 3(2)  | 2(2)   | -3(2)  |
| C(122) | 46(2) | 57(3) | 36(3) | -5(2) | 5(2)   | -3(2)  |
| C(123) | 44(4) | 52(6) | 28(6) | -2(5) | 4(5)   | -7(5)  |
| C(124) | 61(4) | 56(6) | 30(6) | 2(4)  | 5(5)   | -6(4)  |
| C(125) | 67(5) | 57(7) | 36(6) | 6(5)  | -2(5)  | 3(5)   |
| C(126) | 46(5) | 54(6) | 54(7) | 0(5)  | -9(5)  | 1(5)   |
| C(127) | 42(4) | 53(6) | 41(6) | -2(4) | 3(5)   | -3(5)  |
| C(128) | 44(4) | 50(6) | 31(5) | 1(4)  | 4(4)   | 1(4)   |
| C(23A) | 45(3) | 43(5) | 28(4) | -2(4) | 2(3)   | -5(4)  |
| C(24A) | 56(3) | 53(5) | 37(4) | 10(4) | 1(3)   | -19(4) |
| C(25A) | 63(4) | 55(6) | 48(4) | 15(4) | -16(3) | -8(4)  |
| C(26A) | 42(4) | 46(5) | 56(5) | -8(4) | -10(3) | 0(4)   |
| C(27A) | 44(3) | 49(5) | 45(4) | -9(3) | 4(4)   | -5(4)  |
| C(28A) | 45(3) | 37(4) | 31(4) | -3(3) | 3(3)   | -1(3)  |
| C(111) | 42(3) | 71(4) | 44(3) | 11(3) | 13(2)  | -5(3)  |
| C(112) | 34(3) | 74(4) | 43(3) | 2(3)  | 18(2)  | 8(2)   |
| C(113) | 37(3) | 54(3) | 41(3) | -1(2) | 11(2)  | 12(2)  |
| N(104) | 38(2) | 40(2) | 32(2) | 2(2)  | 8(2)   | 4(2)   |
| C(114) | 36(3) | 39(3) | 32(3) | 6(2)  | 1(2)   | 1(2)   |
| C(115) | 43(3) | 48(3) | 37(3) | 0(2)  | 7(2)   | 3(2)   |
| C(116) | 47(3) | 52(3) | 33(3) | -5(2) | 6(2)   | -1(2)  |
| C(117) | 36(3) | 41(3) | 44(3) | 7(2)  | 1(2)   | -4(2)  |
| C(118) | 40(3) | 43(3) | 33(3) | 3(2)  | 9(2)   | -1(2)  |
| C(119) | 33(3) | 38(3) | 29(2) | 4(2)  | 7(2)   | -1(2)  |
| N(105) | 32(2) | 40(2) | 32(2) | 2(2)  | 10(2)  | 1(2)   |

|        |       |       |       |        |       |       |
|--------|-------|-------|-------|--------|-------|-------|
| C(129) | 38(3) | 50(3) | 37(3) | -5(2)  | 11(2) | 1(2)  |
| C(120) | 43(3) | 39(3) | 39(3) | 4(2)   | 13(2) | 2(2)  |
| C(1S)  | 67(4) | 98(5) | 65(4) | -24(4) | 7(3)  | -6(4) |
| C(2S)  | 87(5) | 71(4) | 68(4) | -16(3) | 26(4) | -9(4) |
| C(3S)  | 81(5) | 68(4) | 58(4) | -9(3)  | 21(3) | 11(3) |
| C(4S)  | 78(4) | 75(4) | 50(4) | -4(3)  | 19(3) | 8(4)  |
| C(5S)  | 91(5) | 73(4) | 60(4) | -5(3)  | 19(4) | -4(4) |
| C(6S)  | 72(5) | 84(5) | 66(4) | -7(4)  | -1(3) | 10(4) |

The general temperature factor expression:  $\exp(-2\pi^2(a^{*2}U_{11}h^2 + b^{*2}U_{22}k^2 + c^{*2}U_{33}l^2 + 2a^*b^*U_{12}hk + 2a^*c^*U_{13}hl + 2b^*c^*U_{23}kl))$

**Table S14.** Bond lengths (Å) for **{BnN(CH<sub>2</sub>CH<sub>2</sub>CH<sub>2</sub>-*N*-methylbenzimidazole-2-ylidene)<sub>2</sub>}FeCl<sub>2</sub> (4)**

|             |            |
|-------------|------------|
| Cl(1)-Fe(1) | 2.2790(13) |
| Cl(2)-Fe(1) | 2.2727(12) |
| Fe(1)-C(1)  | 2.103(5)   |
| Fe(1)-C(20) | 2.123(5)   |
| C(1)-N(2)   | 1.361(6)   |
| C(1)-N(1)   | 1.372(6)   |
| N(1)-C(2)   | 1.389(6)   |
| N(1)-C(21)  | 1.456(7)   |
| C(2)-C(7)   | 1.390(7)   |
| C(2)-C(3)   | 1.391(7)   |
| C(3)-C(4)   | 1.360(8)   |
| C(4)-C(5)   | 1.401(8)   |
| C(5)-C(6)   | 1.396(7)   |
| C(6)-C(7)   | 1.384(7)   |
| C(7)-N(2)   | 1.390(5)   |
| N(2)-C(8)   | 1.467(6)   |
| C(8)-C(9)   | 1.504(7)   |
| C(9)-C(10)  | 1.524(6)   |
| C(10)-N(3)  | 1.475(6)   |
| N(3)-C(11)  | 1.466(6)   |
| N(3)-C(22)  | 1.473(5)   |
| C(22)-C(23) | 1.494(6)   |
| C(23)-C(28) | 1.398(6)   |
| C(23)-C(24) | 1.400(7)   |
| C(24)-C(25) | 1.384(7)   |
| C(25)-C(26) | 1.396(7)   |
| C(26)-C(27) | 1.373(7)   |
| C(27)-C(28) | 1.381(6)   |
| C(11)-C(12) | 1.513(6)   |
| C(12)-C(13) | 1.520(6)   |
| C(13)-N(4)  | 1.473(5)   |
| N(4)-C(20)  | 1.364(5)   |
| N(4)-C(14)  | 1.393(5)   |
| C(14)-C(15) | 1.385(6)   |
| C(14)-C(19) | 1.394(6)   |
| C(15)-C(16) | 1.375(6)   |
| C(16)-C(17) | 1.400(6)   |
| C(17)-C(18) | 1.377(6)   |
| C(18)-C(19) | 1.387(6)   |
| C(19)-N(5)  | 1.386(5)   |
| N(5)-C(20)  | 1.359(5)   |

|               |            |
|---------------|------------|
| N(5)-C(29)    | 1.472(6)   |
| Cl(3)-Fe(2)   | 2.2745(12) |
| Cl(4)-Fe(2)   | 2.2786(13) |
| Fe(2)-C(120)  | 2.090(5)   |
| Fe(2)-C(101)  | 2.125(5)   |
| C(101)-N(102) | 1.363(5)   |
| C(101)-N(101) | 1.369(5)   |
| N(101)-C(102) | 1.389(6)   |
| N(101)-C(121) | 1.459(6)   |
| C(102)-C(103) | 1.385(7)   |
| C(102)-C(107) | 1.393(7)   |
| C(103)-C(104) | 1.392(7)   |
| C(104)-C(105) | 1.399(8)   |
| C(105)-C(106) | 1.382(7)   |
| C(106)-C(107) | 1.379(7)   |
| C(107)-N(102) | 1.391(6)   |
| N(102)-C(108) | 1.474(6)   |
| C(108)-C(109) | 1.510(6)   |
| C(109)-C(110) | 1.531(7)   |
| C(110)-N(103) | 1.469(6)   |
| N(103)-C(111) | 1.468(4)   |
| N(103)-C(122) | 1.476(4)   |
| C(111)-C(112) | 1.519(5)   |
| C(112)-C(113) | 1.528(6)   |
| C(113)-N(104) | 1.469(6)   |
| N(104)-C(120) | 1.376(6)   |
| N(104)-C(114) | 1.390(5)   |
| C(114)-C(119) | 1.384(6)   |
| C(114)-C(115) | 1.390(6)   |
| C(115)-C(116) | 1.376(6)   |
| C(116)-C(117) | 1.395(6)   |
| C(117)-C(118) | 1.381(6)   |
| C(118)-C(119) | 1.379(6)   |
| C(119)-N(105) | 1.393(5)   |
| N(105)-C(120) | 1.365(5)   |
| N(105)-C(129) | 1.464(5)   |
| C(1S)-C(2S)   | 1.385(9)   |
| C(1S)-C(6S)   | 1.395(9)   |
| C(2S)-C(3S)   | 1.365(8)   |
| C(3S)-C(4S)   | 1.380(8)   |
| C(4S)-C(5S)   | 1.358(8)   |
| C(5S)-C(6S)   | 1.353(9)   |

**Table S15.** Bond angles (°) for **{BnN(CH<sub>2</sub>CH<sub>2</sub>CH<sub>2</sub>-*N*-methylbenzimidazole-2-ylidene)<sub>2</sub>}FeCl<sub>2</sub> (4)**

|                   |            |
|-------------------|------------|
| C(1)-Fe(1)-C(20)  | 100.59(17) |
| C(1)-Fe(1)-Cl(2)  | 111.46(13) |
| C(20)-Fe(1)-Cl(2) | 116.01(12) |
| C(1)-Fe(1)-Cl(1)  | 112.87(14) |
| C(20)-Fe(1)-Cl(1) | 107.07(12) |
| Cl(2)-Fe(1)-Cl(1) | 108.71(5)  |
| N(2)-C(1)-N(1)    | 104.8(4)   |
| N(2)-C(1)-Fe(1)   | 124.3(3)   |
| N(1)-C(1)-Fe(1)   | 130.4(4)   |

|                     |            |
|---------------------|------------|
| C(1)-N(1)-C(2)      | 111.4(4)   |
| C(1)-N(1)-C(21)     | 125.7(4)   |
| C(2)-N(1)-C(21)     | 122.9(4)   |
| N(1)-C(2)-C(7)      | 106.0(4)   |
| N(1)-C(2)-C(3)      | 131.9(5)   |
| C(7)-C(2)-C(3)      | 122.1(5)   |
| C(4)-C(3)-C(2)      | 117.1(5)   |
| C(3)-C(4)-C(5)      | 121.7(5)   |
| C(6)-C(5)-C(4)      | 121.4(5)   |
| C(7)-C(6)-C(5)      | 116.7(5)   |
| C(6)-C(7)-N(2)      | 132.5(5)   |
| C(6)-C(7)-C(2)      | 121.1(4)   |
| N(2)-C(7)-C(2)      | 106.4(4)   |
| C(1)-N(2)-C(7)      | 111.4(4)   |
| C(1)-N(2)-C(8)      | 123.9(4)   |
| C(7)-N(2)-C(8)      | 124.6(4)   |
| N(2)-C(8)-C(9)      | 114.3(3)   |
| C(8)-C(9)-C(10)     | 110.4(4)   |
| N(3)-C(10)-C(9)     | 111.6(4)   |
| C(11)-N(3)-C(22)    | 110.1(3)   |
| C(11)-N(3)-C(10)    | 110.1(3)   |
| C(22)-N(3)-C(10)    | 110.3(3)   |
| N(3)-C(22)-C(23)    | 113.8(4)   |
| C(28)-C(23)-C(24)   | 117.5(4)   |
| C(28)-C(23)-C(22)   | 120.9(4)   |
| C(24)-C(23)-C(22)   | 121.6(4)   |
| C(25)-C(24)-C(23)   | 120.8(5)   |
| C(24)-C(25)-C(26)   | 120.6(5)   |
| C(27)-C(26)-C(25)   | 118.9(5)   |
| C(26)-C(27)-C(28)   | 120.8(5)   |
| C(27)-C(28)-C(23)   | 121.4(4)   |
| N(3)-C(11)-C(12)    | 115.0(4)   |
| C(11)-C(12)-C(13)   | 115.9(4)   |
| N(4)-C(13)-C(12)    | 113.7(4)   |
| C(20)-N(4)-C(14)    | 111.3(3)   |
| C(20)-N(4)-C(13)    | 123.7(4)   |
| C(14)-N(4)-C(13)    | 125.0(3)   |
| C(15)-C(14)-N(4)    | 133.1(4)   |
| C(15)-C(14)-C(19)   | 120.8(4)   |
| N(4)-C(14)-C(19)    | 106.0(4)   |
| C(16)-C(15)-C(14)   | 117.2(4)   |
| C(15)-C(16)-C(17)   | 121.9(4)   |
| C(18)-C(17)-C(16)   | 121.1(4)   |
| C(17)-C(18)-C(19)   | 116.9(4)   |
| N(5)-C(19)-C(18)    | 132.0(4)   |
| N(5)-C(19)-C(14)    | 106.0(4)   |
| C(18)-C(19)-C(14)   | 122.0(4)   |
| C(20)-N(5)-C(19)    | 111.8(3)   |
| C(20)-N(5)-C(29)    | 124.0(4)   |
| C(19)-N(5)-C(29)    | 124.1(3)   |
| N(5)-C(20)-N(4)     | 104.9(4)   |
| N(5)-C(20)-Fe(1)    | 121.9(3)   |
| N(4)-C(20)-Fe(1)    | 132.3(3)   |
| C(120)-Fe(2)-C(101) | 108.40(17) |
| C(120)-Fe(2)-Cl(3)  | 115.40(13) |
| C(101)-Fe(2)-Cl(3)  | 106.06(12) |

|                      |            |
|----------------------|------------|
| C(120)-Fe(2)-Cl(4)   | 105.05(13) |
| C(101)-Fe(2)-Cl(4)   | 108.35(12) |
| Cl(3)-Fe(2)-Cl(4)    | 113.36(5)  |
| N(102)-C(101)-N(101) | 104.8(4)   |
| N(102)-C(101)-Fe(2)  | 131.0(3)   |
| N(101)-C(101)-Fe(2)  | 124.2(3)   |
| C(101)-N(101)-C(102) | 111.1(4)   |
| C(101)-N(101)-C(121) | 123.5(4)   |
| C(102)-N(101)-C(121) | 125.3(4)   |
| C(103)-C(102)-N(101) | 131.9(4)   |
| C(103)-C(102)-C(107) | 121.4(5)   |
| N(101)-C(102)-C(107) | 106.7(4)   |
| C(102)-C(103)-C(104) | 117.0(5)   |
| C(103)-C(104)-C(105) | 121.1(5)   |
| C(106)-C(105)-C(104) | 121.6(5)   |
| C(107)-C(106)-C(105) | 117.0(5)   |
| C(106)-C(107)-N(102) | 132.6(5)   |
| C(106)-C(107)-C(102) | 121.8(5)   |
| N(102)-C(107)-C(102) | 105.5(4)   |
| C(101)-N(102)-C(107) | 111.9(4)   |
| C(101)-N(102)-C(108) | 124.2(4)   |
| C(107)-N(102)-C(108) | 123.7(4)   |
| N(102)-C(108)-C(109) | 111.7(3)   |
| C(108)-C(109)-C(110) | 112.5(4)   |
| N(103)-C(110)-C(109) | 114.9(4)   |
| C(111)-N(103)-C(110) | 110.4(3)   |
| C(111)-N(103)-C(122) | 108.7(3)   |
| C(110)-N(103)-C(122) | 106.9(3)   |
| N(103)-C(122)-C(23A) | 114.61(16) |
| N(103)-C(122)-C(123) | 113.77(16) |
| N(103)-C(111)-C(112) | 115.8(3)   |
| C(111)-C(112)-C(113) | 115.6(4)   |
| N(104)-C(113)-C(112) | 114.3(4)   |
| C(120)-N(104)-C(114) | 111.4(4)   |
| C(120)-N(104)-C(113) | 124.3(4)   |
| C(114)-N(104)-C(113) | 124.2(4)   |
| C(119)-C(114)-N(104) | 106.5(4)   |
| C(119)-C(114)-C(115) | 121.6(4)   |
| N(104)-C(114)-C(115) | 131.9(4)   |
| C(116)-C(115)-C(114) | 116.1(4)   |
| C(115)-C(116)-C(117) | 122.4(4)   |
| C(118)-C(117)-C(116) | 121.1(4)   |
| C(119)-C(118)-C(117) | 116.8(4)   |
| C(118)-C(119)-C(114) | 122.0(4)   |
| C(118)-C(119)-N(105) | 132.0(4)   |
| C(114)-C(119)-N(105) | 106.0(3)   |
| C(120)-N(105)-C(119) | 111.9(3)   |
| C(120)-N(105)-C(129) | 124.5(4)   |
| C(119)-N(105)-C(129) | 123.6(3)   |
| N(105)-C(120)-N(104) | 104.2(4)   |
| N(105)-C(120)-Fe(2)  | 123.2(3)   |
| N(104)-C(120)-Fe(2)  | 132.3(3)   |
| C(2S)-C(1S)-C(6S)    | 119.2(6)   |
| C(3S)-C(2S)-C(1S)    | 120.0(6)   |
| C(2S)-C(3S)-C(4S)    | 119.4(6)   |
| C(5S)-C(4S)-C(3S)    | 121.0(6)   |

|                   |          |
|-------------------|----------|
| C(6S)-C(5S)-C(4S) | 120.1(6) |
| C(5S)-C(6S)-C(1S) | 120.2(6) |

**X-Ray Data for {BnN(CH<sub>2</sub>CH<sub>2</sub>CH<sub>2</sub>-N-methylbenzimidazole-2-ylidene)<sub>2</sub>}FeBr<sub>2</sub> (5)**

**Table S16.** Crystal data and structure refinement for {BnN(CH<sub>2</sub>CH<sub>2</sub>CH<sub>2</sub>-N-methylbenzimidazole-2-ylidene)<sub>2</sub>}FeBr<sub>2</sub> (5)

|                                   |                                                                                 |                  |
|-----------------------------------|---------------------------------------------------------------------------------|------------------|
| Empirical formula                 | C <sub>65</sub> H <sub>74</sub> Br <sub>4</sub> Fe <sub>2</sub> N <sub>10</sub> |                  |
| Formula weight                    | 1426.68                                                                         |                  |
| Temperature                       | 150(2) K                                                                        |                  |
| Wavelength                        | 0.71075 Å                                                                       |                  |
| Crystal system                    | Monoclinic                                                                      |                  |
| Space group                       | P2(1)/c                                                                         |                  |
| Unit cell dimensions              | a = 9.434(4) Å                                                                  | α = 90°          |
|                                   | b = 30.1020(7) Å                                                                | β = 101.188(15)° |
|                                   | c = 23.0220(16) Å                                                               | γ = 90°          |
| Volume                            | 6414(3) Å <sup>3</sup>                                                          |                  |
| Z                                 | 4                                                                               |                  |
| Density (calculated)              | 1.478 Mg/m <sup>3</sup>                                                         |                  |
| Absorption coefficient            | 2.992 mm <sup>-1</sup>                                                          |                  |
| F(000)                            | 2904                                                                            |                  |
| Crystal size                      | 0.25 x 0.20 x 0.10 mm <sup>3</sup>                                              |                  |
| Theta range for data collection   | 2.99 to 26.37°                                                                  |                  |
| Index ranges                      | -11 ≤ h ≤ 11, -37 ≤ k ≤ 37, -28 ≤ l ≤ 28                                        |                  |
| Reflections collected             | 130163                                                                          |                  |
| Independent reflections           | 13093 [R(int) = 0.0657]                                                         |                  |
| Completeness to theta = 26.37°    | 99.7 %                                                                          |                  |
| Absorption correction             | Semi-empirical from equivalents                                                 |                  |
| Max. and min. transmission        | 0.7541 and 0.5217                                                               |                  |
| Refinement method                 | Full-matrix least-squares on F <sup>2</sup>                                     |                  |
| Data / restraints / parameters    | 13093 / 249 / 798                                                               |                  |
| Goodness-of-fit on F <sup>2</sup> | 1.071                                                                           |                  |
| Final R indices [I > 2σ(I)]       | R <sub>1</sub> = 0.0429, wR <sub>2</sub> = 0.0904                               |                  |
| R indices (all data)              | R <sub>1</sub> = 0.0688, wR <sub>2</sub> = 0.1015                               |                  |
| Largest diff. peak and hole       | 0.807 and -0.679 e.Å <sup>-3</sup>                                              |                  |

**Table S17.** Atomic coordinates (x 10<sup>4</sup>) and Biso/Beq (Å<sup>2</sup> x 10<sup>3</sup>) for {BnN(CH<sub>2</sub>CH<sub>2</sub>CH<sub>2</sub>-N-methylbenzimidazole-2-ylidene)<sub>2</sub>}FeBr<sub>2</sub> (5)

| Atom  | x        | y       | z       | U(eq) |
|-------|----------|---------|---------|-------|
| Fe(1) | 7402(1)  | 297(1)  | 2212(1) | 30(1) |
| Br(1) | 4930(1)  | 329(1)  | 2324(1) | 41(1) |
| Br(2) | 7579(1)  | 782(1)  | 1390(1) | 47(1) |
| C(1)  | 9023(3)  | 522(1)  | 2918(1) | 28(1) |
| N(1)  | 10437(3) | 509(1)  | 2871(1) | 28(1) |
| C(21) | 10981(4) | 297(1)  | 2389(2) | 36(1) |
| C(2)  | 11295(3) | 736(1)  | 3332(1) | 30(1) |
| C(3)  | 12782(4) | 818(1)  | 3457(2) | 35(1) |
| C(4)  | 13285(4) | 1078(1) | 3945(2) | 39(1) |
| C(5)  | 12367(4) | 1254(1) | 4291(2) | 40(1) |
| C(6)  | 10891(4) | 1169(1) | 4166(2) | 36(1) |
| C(7)  | 10373(3) | 901(1)  | 3684(1) | 28(1) |

|        |          |          |         |       |
|--------|----------|----------|---------|-------|
| N(2)   | 8989(3)  | 755(1)   | 3421(1) | 28(1) |
| C(8)   | 7668(3)  | 839(1)   | 3654(2) | 30(1) |
| C(9)   | 7765(4)  | 700(1)   | 4296(2) | 33(1) |
| C(10)  | 8303(4)  | 229(1)   | 4452(2) | 34(1) |
| N(3)   | 7306(3)  | -119(1)  | 4182(1) | 32(1) |
| C(11)  | 8093(4)  | -544(1)  | 4177(2) | 36(1) |
| C(12)  | 8753(4)  | -588(1)  | 3630(2) | 34(1) |
| C(13)  | 7572(4)  | -629(1)  | 3080(2) | 34(1) |
| N(4)   | 8111(3)  | -683(1)  | 2532(1) | 33(1) |
| C(14)  | 8728(3)  | -1074(1) | 2375(2) | 35(1) |
| C(15)  | 9007(4)  | -1483(1) | 2653(2) | 43(1) |
| C(16)  | 9654(4)  | -1800(1) | 2354(2) | 51(1) |
| C(17)  | 10004(4) | -1714(1) | 1809(2) | 56(1) |
| C(18)  | 9719(4)  | -1310(1) | 1532(2) | 53(1) |
| C(19)  | 9069(4)  | -991(1)  | 1827(2) | 41(1) |
| N(5)   | 8619(3)  | -559(1)  | 1675(1) | 40(1) |
| C(29)  | 8715(6)  | -356(2)  | 1108(2) | 61(1) |
| C(20)  | 8048(4)  | -364(1)  | 2111(2) | 33(1) |
| C(22)  | 6105(4)  | -170(1)  | 4500(2) | 40(1) |
| C(23)  | 4884(4)  | -448(1)  | 4161(2) | 37(1) |
| C(24)  | 4302(4)  | -800(1)  | 4418(2) | 41(1) |
| C(25)  | 3161(4)  | -1041(1) | 4103(2) | 51(1) |
| C(26)  | 2607(4)  | -943(1)  | 3521(2) | 52(1) |
| C(27)  | 3199(4)  | -600(1)  | 3254(2) | 54(1) |
| C(28)  | 4312(4)  | -349(1)  | 3570(2) | 48(1) |
| Fe(2)  | 3736(1)  | 7298(1)  | 1046(1) | 31(1) |
| Br(3)  | 1288(1)  | 7212(1)  | 1181(1) | 50(1) |
| Br(4)  | 4194(1)  | 6921(1)  | 172(1)  | 50(1) |
| C(101) | 3999(4)  | 7991(1)  | 949(2)  | 35(1) |
| N(101) | 3532(3)  | 8235(1)  | 449(1)  | 42(1) |
| C(121) | 2842(6)  | 8055(1)  | -122(2) | 66(1) |
| C(102) | 3789(4)  | 8686(1)  | 553(2)  | 46(1) |
| C(103) | 3533(5)  | 9055(1)  | 187(2)  | 60(1) |
| C(104) | 3931(6)  | 9462(1)  | 441(2)  | 66(1) |
| C(105) | 4562(5)  | 9499(1)  | 1038(2) | 63(1) |
| C(106) | 4829(5)  | 9134(1)  | 1401(2) | 50(1) |
| C(107) | 4436(4)  | 8721(1)  | 1145(2) | 39(1) |
| C(108) | 5152(4)  | 8182(1)  | 1988(2) | 36(1) |
| N(102) | 4560(3)  | 8291(1)  | 1369(1) | 34(1) |
| C(109) | 4054(5)  | 8255(1)  | 2380(2) | 50(1) |
| C(110) | 4660(5)  | 8129(1)  | 3021(2) | 53(1) |
| N(103) | 4995(3)  | 7654(1)  | 3117(1) | 37(1) |
| C(111) | 3650(4)  | 7389(2)  | 3032(2) | 50(1) |
| C(112) | 3868(4)  | 6889(1)  | 3028(2) | 47(1) |
| C(113) | 3985(4)  | 6680(1)  | 2441(2) | 39(1) |
| N(104) | 5297(3)  | 6803(1)  | 2221(1) | 32(1) |
| C(114) | 6678(4)  | 6679(1)  | 2506(2) | 32(1) |
| C(115) | 7173(4)  | 6415(1)  | 2996(2) | 40(1) |
| C(116) | 8658(4)  | 6356(1)  | 3154(2) | 44(1) |
| C(117) | 9596(4)  | 6550(1)  | 2832(2) | 46(1) |
| C(118) | 9111(4)  | 6811(1)  | 2335(2) | 37(1) |
| C(119) | 7621(3)  | 6870(1)  | 2184(2) | 32(1) |
| N(105) | 6766(3)  | 7099(1)  | 1720(1) | 29(1) |
| C(129) | 7343(4)  | 7350(1)  | 1279(2) | 37(1) |
| C(120) | 5336(3)  | 7059(1)  | 1741(2) | 30(1) |
| C(122) | 5780(4)  | 7602(1)  | 3733(2) | 47(1) |

---

|        |          |          |         |        |
|--------|----------|----------|---------|--------|
| C(123) | 7325(4)  | 7758(1)  | 3845(2) | 40(1)  |
| C(124) | 8344(4)  | 7525(1)  | 3616(2) | 49(1)  |
| C(125) | 9795(5)  | 7633(1)  | 3760(2) | 58(1)  |
| C(126) | 10234(6) | 7984(2)  | 4135(2) | 69(2)  |
| C(127) | 9220(7)  | 8231(2)  | 4348(2) | 76(2)  |
| C(128) | 7756(6)  | 8122(2)  | 4205(2) | 60(1)  |
| C(7S)  | 1850(12) | 1866(2)  | -87(3)  | 108(3) |
| C(1S)  | 1846(9)  | 1405(2)  | 157(3)  | 78(2)  |
| C(2S)  | 620(8)   | 1171(3)  | 127(3)  | 75(2)  |
| C(3S)  | 621(8)   | 730(3)   | 350(3)  | 81(2)  |
| C(4S)  | 1895(8)  | 540(2)   | 611(4)  | 83(2)  |
| C(5S)  | 3164(8)  | 773(3)   | 631(3)  | 86(2)  |
| C(6S)  | 3141(8)  | 1201(3)  | 410(4)  | 83(2)  |
| C(7T)  | 3180(80) | 1837(14) | 40(20)  | 89(10) |
| C(1T)  | 2630(50) | 1383(15) | 130(20) | 84(5)  |
| C(2T)  | 1170(50) | 1310(18) | 10(30)  | 82(5)  |
| C(3T)  | 550(50)  | 990(20)  | 320(30) | 84(5)  |
| C(4T)  | 1390(60) | 637(19)  | 570(30) | 84(5)  |
| C(5T)  | 2830(60) | 740(20)  | 770(30) | 85(5)  |
| C(6T)  | 3450(40) | 1090(20) | 500(40) | 83(5)  |

$$\text{Beq} = 8/3 \pi^2 (U_{11}(\text{aa}^*)^2 + U_{22}(\text{bb}^*)^2 + U_{33}(\text{cc}^*)^2 + 2U_{12}(\text{aa}^*\text{bb}^*)\cos g + 2U_{13}(\text{aa}^*\text{cc}^*)\cos b + 2U_{23}(\text{bb}^*\text{cc}^*)\cos a)$$

**Table S18.** Anisotropic displacement parameters ( $\text{\AA}^2 \times 10^3$ ) for **{BnN(CH<sub>2</sub>CH<sub>2</sub>CH<sub>2</sub>-N-methylbenzimidazole-2-ylidene)<sub>2</sub>}FeBr<sub>2</sub> (5)**

| Atom  | U <sup>11</sup> | U <sup>22</sup> | U <sup>33</sup> | U <sup>23</sup> | U <sup>13</sup> | U <sup>12</sup> |
|-------|-----------------|-----------------|-----------------|-----------------|-----------------|-----------------|
| Fe(1) | 32(1)           | 32(1)           | 26(1)           | -2(1)           | 5(1)            | -3(1)           |
| Br(1) | 34(1)           | 52(1)           | 38(1)           | 2(1)            | 8(1)            | 4(1)            |
| Br(2) | 57(1)           | 53(1)           | 31(1)           | 7(1)            | 5(1)            | -9(1)           |
| C(1)  | 35(2)           | 25(2)           | 25(2)           | 2(1)            | 7(1)            | -2(1)           |
| N(1)  | 26(1)           | 33(2)           | 26(2)           | -1(1)           | 8(1)            | -2(1)           |
| C(21) | 34(2)           | 44(2)           | 32(2)           | -7(2)           | 10(2)           | -1(2)           |
| C(2)  | 31(2)           | 30(2)           | 26(2)           | 4(1)            | 4(1)            | -3(1)           |
| C(3)  | 30(2)           | 40(2)           | 36(2)           | 4(2)            | 9(2)            | -1(1)           |
| C(4)  | 31(2)           | 48(2)           | 37(2)           | 5(2)            | 3(2)            | -11(2)          |
| C(5)  | 43(2)           | 45(2)           | 31(2)           | -2(2)           | 4(2)            | -13(2)          |
| C(6)  | 44(2)           | 37(2)           | 29(2)           | -2(2)           | 11(2)           | -7(2)           |
| C(7)  | 33(2)           | 29(2)           | 23(2)           | 3(1)            | 8(1)            | -4(1)           |
| N(2)  | 28(1)           | 32(2)           | 22(1)           | 1(1)            | 7(1)            | -5(1)           |
| C(8)  | 28(2)           | 32(2)           | 32(2)           | 0(1)            | 9(1)            | 0(1)            |
| C(9)  | 35(2)           | 36(2)           | 29(2)           | -3(2)           | 10(2)           | -5(1)           |
| C(10) | 32(2)           | 41(2)           | 31(2)           | 3(2)            | 8(2)            | -3(1)           |
| N(3)  | 30(2)           | 32(2)           | 36(2)           | 2(1)            | 16(1)           | 0(1)            |
| C(11) | 42(2)           | 35(2)           | 34(2)           | 5(2)            | 13(2)           | 3(2)            |
| C(12) | 32(2)           | 38(2)           | 33(2)           | 0(2)            | 7(2)            | 7(1)            |
| C(13) | 36(2)           | 36(2)           | 32(2)           | 0(2)            | 9(2)            | 0(1)            |
| N(4)  | 33(2)           | 33(2)           | 32(2)           | -4(1)           | 5(1)            | -1(1)           |
| C(14) | 28(2)           | 34(2)           | 40(2)           | -11(2)          | 2(2)            | 0(1)            |
| C(15) | 40(2)           | 40(2)           | 46(2)           | -8(2)           | 0(2)            | 2(2)            |
| C(16) | 49(2)           | 40(2)           | 57(3)           | -10(2)          | -8(2)           | 7(2)            |
| C(17) | 52(3)           | 47(3)           | 65(3)           | -24(2)          | 0(2)            | 11(2)           |
| C(18) | 55(3)           | 57(3)           | 46(3)           | -24(2)          | 12(2)           | 0(2)            |
| C(19) | 39(2)           | 41(2)           | 40(2)           | -14(2)          | 2(2)            | -1(2)           |



|        |         |        |        |         |        |        |
|--------|---------|--------|--------|---------|--------|--------|
| N(5)   | 53(2)   | 38(2)  | 31(2)  | -8(1)   | 10(1)  | -4(1)  |
| C(29)  | 96(4)   | 55(3)  | 40(3)  | -6(2)   | 29(2)  | 2(2)   |
| C(20)  | 32(2)   | 38(2)  | 29(2)  | -7(2)   | 6(2)   | -6(1)  |
| C(22)  | 47(2)   | 40(2)  | 40(2)  | -3(2)   | 24(2)  | -7(2)  |
| C(23)  | 38(2)   | 33(2)  | 43(2)  | -1(2)   | 19(2)  | 1(2)   |
| C(24)  | 52(2)   | 36(2)  | 38(2)  | 0(2)    | 17(2)  | -4(2)  |
| C(25)  | 54(2)   | 38(2)  | 63(3)  | -1(2)   | 19(2)  | -9(2)  |
| C(26)  | 34(2)   | 50(2)  | 70(3)  | -5(2)   | 7(2)   | 6(2)   |
| C(27)  | 42(2)   | 59(3)  | 58(3)  | 10(2)   | 1(2)   | 10(2)  |
| C(28)  | 43(2)   | 48(2)  | 54(3)  | 14(2)   | 12(2)  | 3(2)   |
| Fe(2)  | 27(1)   | 34(1)  | 31(1)  | -4(1)   | 4(1)   | 2(1)   |
| Br(3)  | 30(1)   | 53(1)  | 68(1)  | -1(1)   | 14(1)  | 1(1)   |
| Br(4)  | 52(1)   | 60(1)  | 34(1)  | -10(1)  | 2(1)   | 23(1)  |
| C(101) | 34(2)   | 38(2)  | 30(2)  | -5(2)   | 0(2)   | 3(1)   |
| N(101) | 58(2)   | 37(2)  | 27(2)  | -2(1)   | -5(1)  | 4(1)   |
| C(121) | 102(4)  | 49(3)  | 33(2)  | -12(2)  | -17(2) | 14(2)  |
| C(102) | 61(3)   | 36(2)  | 36(2)  | -1(2)   | 0(2)   | 3(2)   |
| C(103) | 89(3)   | 50(3)  | 37(2)  | 5(2)    | -3(2)  | 8(2)   |
| C(104) | 101(4)  | 38(2)  | 53(3)  | 7(2)    | 2(3)   | 8(2)   |
| C(105) | 83(3)   | 36(2)  | 62(3)  | -2(2)   | -7(2)  | -7(2)  |
| C(106) | 62(3)   | 39(2)  | 44(2)  | -1(2)   | -8(2)  | -2(2)  |
| C(107) | 42(2)   | 38(2)  | 35(2)  | 0(2)    | -1(2)  | 1(2)   |
| C(108) | 35(2)   | 38(2)  | 30(2)  | -1(2)   | -4(2)  | 3(2)   |
| N(102) | 34(2)   | 34(2)  | 30(2)  | 0(1)    | -2(1)  | 0(1)   |
| C(109) | 57(3)   | 56(3)  | 39(2)  | 0(2)    | 11(2)  | 22(2)  |
| C(110) | 70(3)   | 55(3)  | 34(2)  | -7(2)   | 14(2)  | 17(2)  |
| N(103) | 41(2)   | 43(2)  | 27(2)  | -3(1)   | 6(1)   | 2(1)   |
| C(111) | 30(2)   | 79(3)  | 44(2)  | -11(2)  | 16(2)  | 5(2)   |
| C(112) | 35(2)   | 68(3)  | 43(2)  | -1(2)   | 17(2)  | -15(2) |
| C(113) | 33(2)   | 45(2)  | 40(2)  | -2(2)   | 8(2)   | -14(2) |
| N(104) | 31(2)   | 32(2)  | 31(2)  | -1(1)   | 4(1)   | -3(1)  |
| C(114) | 34(2)   | 28(2)  | 32(2)  | -5(1)   | 1(2)   | -1(1)  |
| C(115) | 50(2)   | 32(2)  | 37(2)  | 0(2)    | 7(2)   | -6(2)  |
| C(116) | 54(2)   | 35(2)  | 38(2)  | 4(2)    | -7(2)  | 3(2)   |
| C(117) | 39(2)   | 43(2)  | 48(2)  | -4(2)   | -8(2)  | 7(2)   |
| C(118) | 31(2)   | 40(2)  | 40(2)  | -2(2)   | 6(2)   | 4(2)   |
| C(119) | 31(2)   | 31(2)  | 32(2)  | -5(1)   | 1(2)   | 1(1)   |
| N(105) | 26(1)   | 32(2)  | 29(2)  | 1(1)    | 7(1)   | 2(1)   |
| C(129) | 28(2)   | 44(2)  | 40(2)  | 7(2)    | 10(2)  | 0(2)   |
| C(120) | 30(2)   | 30(2)  | 29(2)  | -2(1)   | 6(1)   | -3(1)  |
| C(122) | 58(3)   | 54(2)  | 28(2)  | -1(2)   | 9(2)   | 0(2)   |
| C(123) | 54(2)   | 43(2)  | 19(2)  | -1(2)   | 1(2)   | -7(2)  |
| C(124) | 54(3)   | 41(2)  | 49(3)  | -7(2)   | -2(2)  | -5(2)  |
| C(125) | 50(3)   | 49(3)  | 72(3)  | 6(2)    | 1(2)   | -3(2)  |
| C(126) | 67(3)   | 62(3)  | 62(3)  | 11(3)   | -24(3) | -28(3) |
| C(127) | 105(4)  | 67(3)  | 45(3)  | -14(2)  | -8(3)  | -30(3) |
| C(128) | 88(3)   | 57(3)  | 34(2)  | -14(2)  | 9(2)   | -11(2) |
| C(7S)  | 185(9)  | 74(4)  | 55(4)  | -9(3)   | 1(5)   | -5(4)  |
| C(1S)  | 115(5)  | 85(3)  | 35(3)  | -11(3)  | 15(3)  | 9(3)   |
| C(2S)  | 100(4)  | 95(4)  | 38(3)  | 6(3)    | 30(3)  | 24(3)  |
| C(3S)  | 94(4)   | 98(4)  | 61(4)  | 7(4)    | 36(3)  | 23(3)  |
| C(4S)  | 103(5)  | 90(4)  | 64(4)  | 9(3)    | 37(4)  | 32(3)  |
| C(5S)  | 99(4)   | 105(4) | 61(4)  | 5(4)    | 34(3)  | 28(3)  |
| C(6S)  | 104(4)  | 100(4) | 46(4)  | -6(3)   | 15(4)  | 8(3)   |
| C(7T)  | 130(20) | 93(14) | 50(20) | -16(15) | 20(20) | 9(14)  |
| C(1T)  | 110(9)  | 98(9)  | 45(10) | -5(8)   | 17(9)  | 12(8)  |

|       |        |         |        |       |        |       |
|-------|--------|---------|--------|-------|--------|-------|
| C(2T) | 107(8) | 101(10) | 41(10) | 2(8)  | 21(10) | 21(9) |
| C(3T) | 104(8) | 99(10)  | 55(11) | 6(10) | 29(9)  | 28(8) |
| C(4T) | 99(8)  | 99(9)   | 59(9)  | 6(8)  | 31(9)  | 28(8) |
| C(5T) | 102(8) | 99(9)   | 58(10) | 0(8)  | 26(9)  | 26(8) |
| C(6T) | 101(9) | 100(10) | 50(10) | -7(9) | 22(9)  | 19(8) |

The general temperature factor expression:  $\exp(-2\pi^2(a^*U_{11}h^2 + b^*U_{22}k^2 + c^*U_{33}l^2 + 2a*b^*U_{12}hk + 2a*c^*U_{13}hl + 2b*c^*U_{23}kl))$

**Table S19.** Bond lengths (Å) for **{BnN(CH<sub>2</sub>CH<sub>2</sub>CH<sub>2</sub>-N-methylbenzimidazole-2-ylidene)<sub>2</sub>}FeBr<sub>2</sub> (5)**

|              |            |
|--------------|------------|
| Fe(1)-C(20)  | 2.109(3)   |
| Fe(1)-C(1)   | 2.115(3)   |
| Fe(1)-Br(1)  | 2.3969(12) |
| Fe(1)-Br(2)  | 2.4209(6)  |
| C(1)-N(2)    | 1.358(4)   |
| C(1)-N(1)    | 1.359(4)   |
| N(1)-C(2)    | 1.384(4)   |
| N(1)-C(21)   | 1.458(4)   |
| C(2)-C(7)    | 1.390(5)   |
| C(2)-C(3)    | 1.398(5)   |
| C(3)-C(4)    | 1.376(5)   |
| C(4)-C(5)    | 1.391(5)   |
| C(5)-C(6)    | 1.390(5)   |
| C(6)-C(7)    | 1.382(5)   |
| C(7)-N(2)    | 1.400(4)   |
| N(2)-C(8)    | 1.472(4)   |
| C(8)-C(9)    | 1.524(5)   |
| C(9)-C(10)   | 1.526(5)   |
| C(10)-N(3)   | 1.465(4)   |
| N(3)-C(22)   | 1.471(4)   |
| N(3)-C(11)   | 1.480(4)   |
| C(11)-C(12)  | 1.516(5)   |
| C(12)-C(13)  | 1.521(5)   |
| C(13)-N(4)   | 1.456(4)   |
| N(4)-C(20)   | 1.359(4)   |
| N(4)-C(14)   | 1.391(4)   |
| C(14)-C(19)  | 1.383(5)   |
| C(14)-C(15)  | 1.390(5)   |
| C(15)-C(16)  | 1.385(5)   |
| C(16)-C(17)  | 1.384(6)   |
| C(17)-C(18)  | 1.375(6)   |
| C(18)-C(19)  | 1.388(5)   |
| C(19)-N(5)   | 1.391(5)   |
| N(5)-C(20)   | 1.359(4)   |
| N(5)-C(29)   | 1.461(5)   |
| C(22)-C(23)  | 1.511(5)   |
| C(23)-C(24)  | 1.380(5)   |
| C(23)-C(28)  | 1.395(5)   |
| C(24)-C(25)  | 1.382(5)   |
| C(25)-C(26)  | 1.373(6)   |
| C(26)-C(27)  | 1.373(6)   |
| C(27)-C(28)  | 1.380(6)   |
| Fe(2)-C(120) | 2.102(3)   |

|               |            |
|---------------|------------|
| Fe(2)-C(101)  | 2.117(4)   |
| Fe(2)-Br(3)   | 2.4034(12) |
| Fe(2)-Br(4)   | 2.4210(6)  |
| C(101)-N(102) | 1.354(4)   |
| C(101)-N(101) | 1.365(4)   |
| N(101)-C(102) | 1.392(5)   |
| N(101)-C(121) | 1.453(5)   |
| C(102)-C(107) | 1.384(5)   |
| C(102)-C(103) | 1.389(5)   |
| C(103)-C(104) | 1.377(6)   |
| C(104)-C(105) | 1.393(6)   |
| C(105)-C(106) | 1.373(6)   |
| C(106)-C(107) | 1.395(5)   |
| C(107)-N(102) | 1.390(4)   |
| C(108)-N(102) | 1.463(4)   |
| C(108)-C(109) | 1.515(5)   |
| C(109)-C(110) | 1.524(5)   |
| C(110)-N(103) | 1.472(5)   |
| N(103)-C(122) | 1.476(5)   |
| N(103)-C(111) | 1.480(5)   |
| C(111)-C(112) | 1.518(6)   |
| C(112)-C(113) | 1.514(5)   |
| C(113)-N(104) | 1.473(4)   |
| N(104)-C(120) | 1.354(4)   |
| N(104)-C(114) | 1.392(4)   |
| C(114)-C(115) | 1.384(5)   |
| C(114)-C(119) | 1.389(5)   |
| C(115)-C(116) | 1.389(5)   |
| C(116)-C(117) | 1.387(6)   |
| C(117)-C(118) | 1.389(5)   |
| C(118)-C(119) | 1.392(5)   |
| C(119)-N(105) | 1.390(4)   |
| N(105)-C(120) | 1.364(4)   |
| N(105)-C(129) | 1.455(4)   |
| C(122)-C(123) | 1.505(5)   |
| C(123)-C(124) | 1.375(6)   |
| C(123)-C(128) | 1.385(5)   |
| C(124)-C(125) | 1.383(6)   |
| C(125)-C(126) | 1.377(6)   |
| C(126)-C(127) | 1.376(7)   |
| C(127)-C(128) | 1.396(7)   |
| C(7S)-C(1S)   | 1.499(9)   |
| C(1S)-C(2S)   | 1.344(9)   |
| C(1S)-C(6S)   | 1.390(9)   |
| C(2S)-C(3S)   | 1.424(9)   |
| C(3S)-C(4S)   | 1.362(8)   |
| C(4S)-C(5S)   | 1.380(9)   |
| C(5S)-C(6S)   | 1.383(9)   |
| C(7T)-C(1T)   | 1.49(2)    |
| C(1T)-C(6T)   | 1.362(16)  |
| C(1T)-C(2T)   | 1.373(17)  |
| C(2T)-C(3T)   | 1.397(17)  |
| C(3T)-C(4T)   | 1.383(17)  |
| C(4T)-C(5T)   | 1.380(17)  |
| C(5T)-C(6T)   | 1.399(17)  |

**Table S20.** Bond angles (°) for **{BnN(CH<sub>2</sub>CH<sub>2</sub>CH<sub>2</sub>-*N*-methylbenzimidazole-2-ylidene)<sub>2</sub>}FeBr<sub>2</sub> (5)**

|                   |            |
|-------------------|------------|
| C(20)-Fe(1)-C(1)  | 101.90(13) |
| C(20)-Fe(1)-Br(1) | 110.93(9)  |
| C(1)-Fe(1)-Br(1)  | 118.58(9)  |
| C(20)-Fe(1)-Br(2) | 114.63(10) |
| C(1)-Fe(1)-Br(2)  | 104.96(9)  |
| Br(1)-Fe(1)-Br(2) | 106.06(2)  |
| N(2)-C(1)-N(1)    | 105.5(3)   |
| N(2)-C(1)-Fe(1)   | 133.3(2)   |
| N(1)-C(1)-Fe(1)   | 120.3(2)   |
| C(1)-N(1)-C(2)    | 111.2(3)   |
| C(1)-N(1)-C(21)   | 124.7(3)   |
| C(2)-N(1)-C(21)   | 124.1(3)   |
| N(1)-C(2)-C(7)    | 106.5(3)   |
| N(1)-C(2)-C(3)    | 131.2(3)   |
| C(7)-C(2)-C(3)    | 122.3(3)   |
| C(4)-C(3)-C(2)    | 116.2(3)   |
| C(3)-C(4)-C(5)    | 122.0(3)   |
| C(6)-C(5)-C(4)    | 121.5(3)   |
| C(7)-C(6)-C(5)    | 117.2(3)   |
| C(6)-C(7)-C(2)    | 120.8(3)   |
| C(6)-C(7)-N(2)    | 133.4(3)   |
| C(2)-C(7)-N(2)    | 105.7(3)   |
| C(1)-N(2)-C(7)    | 110.9(3)   |
| C(1)-N(2)-C(8)    | 124.2(3)   |
| C(7)-N(2)-C(8)    | 124.9(3)   |
| N(2)-C(8)-C(9)    | 114.2(3)   |
| C(8)-C(9)-C(10)   | 116.0(3)   |
| N(3)-C(10)-C(9)   | 114.1(3)   |
| C(10)-N(3)-C(22)  | 110.8(3)   |
| C(10)-N(3)-C(11)  | 109.8(3)   |
| C(22)-N(3)-C(11)  | 110.5(3)   |
| N(3)-C(11)-C(12)  | 111.7(3)   |
| C(11)-C(12)-C(13) | 110.2(3)   |
| N(4)-C(13)-C(12)  | 114.0(3)   |
| C(20)-N(4)-C(14)  | 111.9(3)   |
| C(20)-N(4)-C(13)  | 124.4(3)   |
| C(14)-N(4)-C(13)  | 123.6(3)   |
| C(19)-C(14)-C(15) | 121.6(3)   |
| C(19)-C(14)-N(4)  | 105.5(3)   |
| C(15)-C(14)-N(4)  | 132.9(4)   |
| C(16)-C(15)-C(14) | 116.3(4)   |
| C(17)-C(16)-C(15) | 121.8(4)   |
| C(18)-C(17)-C(16) | 121.8(4)   |
| C(17)-C(18)-C(19) | 116.8(4)   |
| C(14)-C(19)-C(18) | 121.7(4)   |
| C(14)-C(19)-N(5)  | 106.6(3)   |
| C(18)-C(19)-N(5)  | 131.8(4)   |
| C(20)-N(5)-C(19)  | 111.2(3)   |
| C(20)-N(5)-C(29)  | 125.5(3)   |
| C(19)-N(5)-C(29)  | 123.2(3)   |
| N(4)-C(20)-N(5)   | 104.7(3)   |
| N(4)-C(20)-Fe(1)  | 124.2(2)   |

|                      |            |
|----------------------|------------|
| N(5)-C(20)-Fe(1)     | 130.8(3)   |
| N(3)-C(22)-C(23)     | 112.6(3)   |
| C(24)-C(23)-C(28)    | 118.1(4)   |
| C(24)-C(23)-C(22)    | 122.1(3)   |
| C(28)-C(23)-C(22)    | 119.9(3)   |
| C(23)-C(24)-C(25)    | 120.8(4)   |
| C(26)-C(25)-C(24)    | 120.7(4)   |
| C(25)-C(26)-C(27)    | 119.1(4)   |
| C(26)-C(27)-C(28)    | 120.7(4)   |
| C(27)-C(28)-C(23)    | 120.6(4)   |
| C(120)-Fe(2)-C(101)  | 109.61(13) |
| C(120)-Fe(2)-Br(3)   | 115.53(10) |
| C(101)-Fe(2)-Br(3)   | 104.77(10) |
| C(120)-Fe(2)-Br(4)   | 104.72(9)  |
| C(101)-Fe(2)-Br(4)   | 109.30(10) |
| Br(3)-Fe(2)-Br(4)    | 112.88(3)  |
| N(102)-C(101)-N(101) | 105.1(3)   |
| N(102)-C(101)-Fe(2)  | 128.3(3)   |
| N(101)-C(101)-Fe(2)  | 126.5(2)   |
| C(101)-N(101)-C(102) | 111.2(3)   |
| C(101)-N(101)-C(121) | 125.2(3)   |
| C(102)-N(101)-C(121) | 123.5(3)   |
| C(107)-C(102)-C(103) | 121.8(4)   |
| C(107)-C(102)-N(101) | 105.9(3)   |
| C(103)-C(102)-N(101) | 132.2(4)   |
| C(104)-C(103)-C(102) | 117.0(4)   |
| C(103)-C(104)-C(105) | 121.3(4)   |
| C(106)-C(105)-C(104) | 122.0(4)   |
| C(105)-C(106)-C(107) | 117.0(4)   |
| C(102)-C(107)-N(102) | 106.4(3)   |
| C(102)-C(107)-C(106) | 121.0(3)   |
| N(102)-C(107)-C(106) | 132.6(3)   |
| N(102)-C(108)-C(109) | 111.8(3)   |
| C(101)-N(102)-C(107) | 111.3(3)   |
| C(101)-N(102)-C(108) | 124.7(3)   |
| C(107)-N(102)-C(108) | 123.9(3)   |
| C(108)-C(109)-C(110) | 111.7(3)   |
| N(103)-C(110)-C(109) | 114.6(3)   |
| C(110)-N(103)-C(122) | 107.5(3)   |
| C(110)-N(103)-C(111) | 110.6(3)   |
| C(122)-N(103)-C(111) | 109.1(3)   |
| N(103)-C(111)-C(112) | 115.0(3)   |
| C(113)-C(112)-C(111) | 116.7(3)   |
| N(104)-C(113)-C(112) | 114.5(3)   |
| C(120)-N(104)-C(114) | 111.6(3)   |
| C(120)-N(104)-C(113) | 125.6(3)   |
| C(114)-N(104)-C(113) | 122.8(3)   |
| C(115)-C(114)-C(119) | 121.5(3)   |
| C(115)-C(114)-N(104) | 132.5(3)   |
| C(119)-C(114)-N(104) | 105.9(3)   |
| C(114)-C(115)-C(116) | 116.7(4)   |
| C(117)-C(116)-C(115) | 121.5(4)   |
| C(116)-C(117)-C(118) | 122.3(4)   |
| C(117)-C(118)-C(119) | 115.6(4)   |
| C(114)-C(119)-N(105) | 106.2(3)   |
| C(114)-C(119)-C(118) | 122.3(3)   |

|                      |          |
|----------------------|----------|
| N(105)-C(119)-C(118) | 131.5(3) |
| C(120)-N(105)-C(119) | 111.2(3) |
| C(120)-N(105)-C(129) | 125.2(3) |
| C(119)-N(105)-C(129) | 123.6(3) |
| N(104)-C(120)-N(105) | 105.2(3) |
| N(104)-C(120)-Fe(2)  | 133.4(2) |
| N(105)-C(120)-Fe(2)  | 120.9(2) |
| N(103)-C(122)-C(123) | 114.8(3) |
| C(124)-C(123)-C(128) | 119.1(4) |
| C(124)-C(123)-C(122) | 120.1(3) |
| C(128)-C(123)-C(122) | 120.7(4) |
| C(123)-C(124)-C(125) | 121.4(4) |
| C(126)-C(125)-C(124) | 119.6(5) |
| C(127)-C(126)-C(125) | 119.6(5) |
| C(126)-C(127)-C(128) | 120.8(4) |
| C(123)-C(128)-C(127) | 119.4(5) |
| C(2S)-C(1S)-C(6S)    | 117.9(7) |
| C(2S)-C(1S)-C(7S)    | 122.0(7) |
| C(6S)-C(1S)-C(7S)    | 120.1(7) |
| C(1S)-C(2S)-C(3S)    | 122.0(6) |
| C(4S)-C(3S)-C(2S)    | 119.3(7) |
| C(3S)-C(4S)-C(5S)    | 119.2(7) |
| C(4S)-C(5S)-C(6S)    | 120.6(7) |
| C(5S)-C(6S)-C(1S)    | 121.0(7) |
| C(6T)-C(1T)-C(2T)    | 117(2)   |
| C(6T)-C(1T)-C(7T)    | 121(2)   |
| C(2T)-C(1T)-C(7T)    | 119(2)   |
| C(1T)-C(2T)-C(3T)    | 120(2)   |
| C(4T)-C(3T)-C(2T)    | 119(3)   |
| C(5T)-C(4T)-C(3T)    | 114(3)   |
| C(4T)-C(5T)-C(6T)    | 119(2)   |
| C(1T)-C(6T)-C(5T)    | 122(2)   |

---

<sup>i</sup> Sheldrick, G. M. *Acta Cryst.* **1990**, A46, 467-473.

<sup>ii</sup> Sheldrick, G. M. *Acta Cryst.* **2008**, A64, 112-122.

<sup>iii</sup> Müller, P. *Crystallography Reviews* **2009**, 15, 57-83.
